1 TITLE:

2 *Noncanonical scaffolding of G<sub>αi</sub> and β-arrestin by G protein-coupled receptors*

3 AUTHORS:

4 Jeffrey S. Smith<sup>1,2\*</sup>, Thomas F. Pack<sup>3,4\*</sup>, Asuka Inoue<sup>5</sup>, Claudia Lee<sup>2</sup>, Xinyu Xiong<sup>2</sup>, Kevin Zheng<sup>2</sup>,  
5 Alem W. Kahsai<sup>2</sup>, Issac Choi<sup>2</sup>, Zhiyuan Ma<sup>2</sup>, Ian M. Levitan<sup>3</sup>, Lauren K. Rochelle<sup>3,6</sup>, Dean P.  
6 Staus<sup>2</sup>, Joshua C. Snyder<sup>3,6</sup>, Marc G. Caron<sup>1,3,7</sup> & Sudarshan Rajagopal<sup>1,2</sup>

7

8 AFFILIATIONS:

9 Departments of Medicine<sup>1</sup>, Biochemistry<sup>2</sup>, Cell Biology<sup>3</sup>, Pharmacology and Cancer Biology<sup>4</sup>,  
10 Surgery<sup>6</sup>, and Neurobiology<sup>7</sup>, Duke University Medical Center, Durham, NC 27710, USA;  
11 Department of Pharmaceutical Sciences, Tohoku University, Japan<sup>5</sup>.

12

13 \*These authors contributed equally to this work.

14

15

16

17

18

19

20

21

22

23

24

25

26

27

28

29

30

31

32

33

34

35

36

37

38

39

40

41

42

43

44

45

46

## 47 **Summary**

48 G-protein-coupled receptors (GPCRs) enable cells to sense and respond appropriately  
49 to hormonal and environmental signals, and are a target of ~30% of all FDA-approved  
50 medications. Canonically, each GPCR couples to distinct  $G_{\alpha}$  proteins, such as  $G_{\alpha_s}$ ,  $G_{\alpha_i}$ ,  $G_{\alpha_q}$  or  
51  $G_{\alpha_{12/13}}$ , as well as  $\beta$ -arrestins. These transducer proteins translate and integrate  
52 extracellular stimuli sensed by GPCRs into intracellular signals through what are broadly  
53 considered separable signalling pathways. However, the ability of  $G_{\alpha}$  proteins to directly interact  
54 with  $\beta$ -arrestins to integrate signalling has not previously been appreciated. Here we show a  
55 novel interaction between  $G_{\alpha_i}$  protein family members and  $\beta$ -arrestin.  $G_{\alpha_i}$ : $\beta$ -arrestin complexes  
56 were formed by all GPCRs tested, regardless of their canonical G protein isoform coupling, and  
57 could bind both GPCRs as well as the extracellular signal-regulated kinase (ERK). This novel  
58 paradigm of  $G_{\alpha_i}$ : $\beta$ -arrestin scaffolds enhances our understanding of GPCR signalling.  
59

## 60 **Introduction**

61 Classically, G protein-coupled receptors (GPCRs) couple to a distinct  $G_{\alpha}$  protein and  
62 activate G proteins by catalyzing guanine nucleotide exchange.  $\beta$ -arrestins were subsequently  
63 discovered to both regulate and transduce GPCR signalling. More recently, the ability of G  
64 proteins<sup>1</sup> and  $\beta$ -arrestins<sup>2</sup> to coordinate their signalling has been suggested by the demonstration  
65 of “megaplex” signalling complexes consisting of a GPCR together with *both* G protein and  $\beta$ -  
66 arrestin<sup>3,4</sup>. However, the ability of  $G_{\alpha}$  proteins to *directly* interact with  $\beta$ -arrestins to form signalling  
67 scaffolds has not previously been appreciated. Here, we use a ‘complex’ bioluminescent  
68 resonance energy transfer (BRET) approach to identify a novel  $G_{\alpha}$  protein- $\beta$ -arrestin interaction.  
69 Agonist treatment of the  $G_{\alpha_s}$ -coupled vasopressin type 2 receptor ( $V_2R$ ) paradoxically catalysed  
70 the formation of  $G_{\alpha_i}$ : $\beta$ -arrestin scaffolds that were not observed with other  $G_{\alpha}$  families, despite the  
71 inability of the vasopressin-treated receptor to promote canonical  $G_{\alpha_i}$ -mediated signalling. These  
72  $G_{\alpha_i}$ : $\beta$ -arrestin complexes were also formed downstream of all GPCRs tested, including the  $\beta_2$ -  
73 adrenergic receptor ( $\beta_2AR$ ), neurotensin receptor type 1 ( $NT_1R$ ), dopamine D1 and D2 receptors  
74 ( $D_1R$ ,  $D_2R$ ), and C-X-C motif chemokine receptor 3 ( $CXCR3$ ), of which only  $D_2R$  and  $CXCR3$   
75 canonically activate  $G_{\alpha_i}$ . These scaffolds were not observed to form with other  $G_{\alpha}$  subtypes. The  
76  $G_{\alpha_i}$ : $\beta$ -arrestin scaffolds can form “megaplexes” with GPCRs and can also bind extracellular signal-  
77 regulated kinase (ERK). Disrupting  $G_{\alpha_i}$  and  $\beta$ -arrestin interactions eliminated  $V_2R$  mediated  
78 transduction of ERK phosphorylation. In addition, disrupting  $G_{\alpha_i}$  and  $\beta$ -arrestin interactions  
79 eliminated GPCR-mediated migration in response to a  $\beta$ -arrestin-biased agonist that does not  
80 stimulate canonical  $G_{\alpha_i}$  signalling. These results uncover a novel GPCR signalling paradigm  
81 involving the formation of noncanonical  $G_{\alpha_i}$ : $\beta$ -arrestin signalling scaffolds.  
82

## 83 **$\beta$ -arrestin, $G_{\alpha_i}$ , and receptor form complexes**

84 It is well established that GPCRs differentially associate with  $\beta$ -arrestins following  
85 agonist treatment<sup>5</sup>. For example, agonist treatment of certain receptors, such as the  $G_{\alpha_s}$ -  
86 coupled  $V_2R$ , results in a long-lived receptor association with  $\beta$ -arrestin, contrasting with other  
87 receptors, such as the  $\beta_2AR$ , that form transient interactions with  $\beta$ -arrestin with dissociation  
88 occurring at or near the plasma membrane<sup>6</sup>. More recently, it has been shown that  $G_{\alpha_s}$ ,  $\beta$ -  
89 arrestin, and a GPCR can form signalling ‘megaplexes’<sup>3</sup>. To further interrogate the composition  
90 of megaplexes, we utilized a ‘complex BRET’ approach (Fig. 1a), similar to other BRET-based  
91 strategies to assess complex formation<sup>7,8</sup>, to confirm simultaneous interactions between  $G_{\alpha_s}$ ,  $\beta$ -  
92 arrestin, and  $V_2R$  following agonist treatment (Fig. 1b,c). Complex BRET requires  
93 complementation of a low affinity split luciferase (nanoBiT) (shown not to affect underlying  
94 protein:protein interactions<sup>9</sup>) by complementing a small peptide (smBiT) fused to one protein to  
95 a large protein fragment (LgBiT) fused to another protein of interest. The signal generated by  
96 complementation of this split luciferase can then transfer to a third protein tagged with a

97 fluorescent protein acceptor, monomeric Kusabira Orange (mKO), generating a BRET  
 98 response. Thus, this technique enables real-time quantification of interactions between a two-  
 99 protein complex and a third protein in living cells.

100 Using this technology, we were surprised to discover that the canonically  $G_{\alpha_s}$ -coupled  $V_2R$   
 101 also formed a 'megaplex' with  $G_{\alpha_i}$  and  $\beta$ -arrestin following agonist treatment (Fig. 1d,e). To further  
 102 interrogate the  $G_{\alpha_i}$ : $\beta$ -arrestin: $V_2R$  megaplex, we proceeded to swap the location of dipole donor  
 103 and acceptor components (Fig. 1f). Altering the location of complex BRET components increased  
 104 the observed signal of the  $G_{\alpha_i}$ -containing megaplex following agonist treatment, and further  
 105 confirmed that  $G_{\alpha_i}$ : $\beta$ -arrestin complexes can associate with the  $V_2R$  (Fig 1g,h, Extended Data Fig.  
 106 1a). Agonist treatment of the canonically  $G_{\alpha_s}$ -coupled  $\beta_2AR$  also formed  $G_{\alpha_i}$ : $\beta$ -arrestin: $\beta_2AR$   
 107 megaplexes (Fig 1i,j, Extended Data Fig. 1b), although less robustly than the  $V_2R$ . We further  
 108 validated the specificity of megaplex formation by simultaneously transfected both mKO-tagged  
 109 and untagged  $V_2R$  and  $\beta_2AR$  and treating with agonist. Only treating a mKO-tagged receptor with  
 110 its cognate agonist formed an observable  $G_{\alpha_i}$ : $\beta$ -arrestin:GPCR megaplex (Extended Data Fig 1c-  
 111 h), indicating a specific interaction and not a bystander effect.

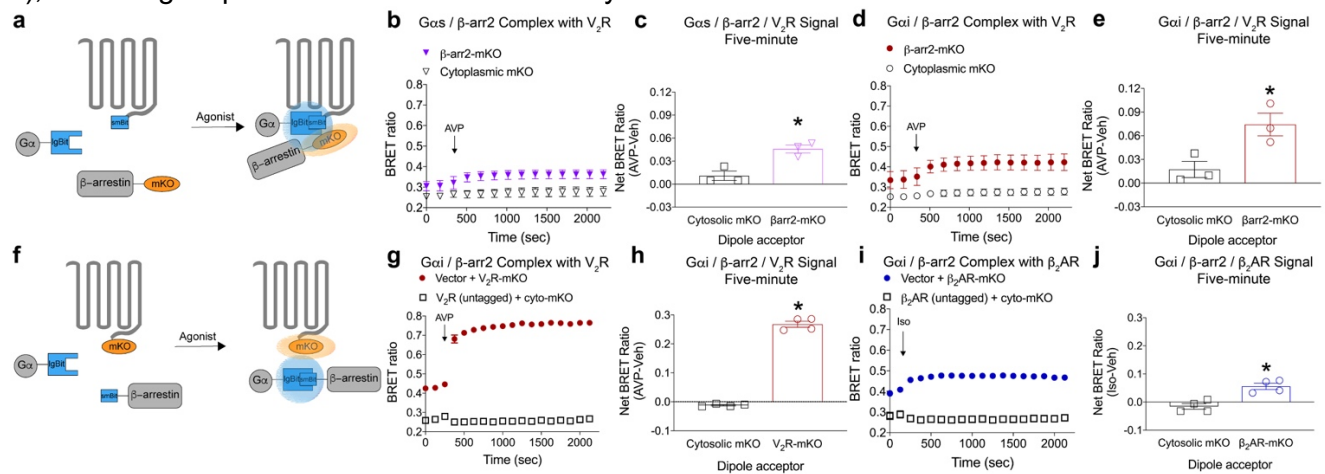

112 **Figure 1: Formation of G protein:β-arrestin:GPCR megaplexes.** a, Arrangement of luciferase fragments and mKO  
 113 acceptor fluorophore for complex BRET on G protein (LgBiT), β-arrestin (mKO), and V<sub>2</sub>R (SmBiT). HEK 293T cells were  
 114 transiently transfected with the indicated receptor and assay components and stimulated with the indicated agonist or  
 115 vehicle. b, Complex BRET ratio of  $G_{\alpha_s}$ : $\beta$ -arrestin: $V_2R$  following AVP (500 nM) treatment. After AVP treatment, an  
 116 increase in the BRET ratio was observed in cells expressing β-arrestin-mKO, but not cytosolic mKO. c, Quantification  
 117 of  $G_{\alpha_s}$ :mKO: $V_2R$  complex formation in cells treated with either vehicle or AVP at a single five-minute timepoint. Full  
 118 kinetic data is available in the extended data. d, Similar experiment to panel b, except testing the ability of  $G_{\alpha_i}$  to form  
 119 a 'megaplex.' Complex BRET ratio of  $G_{\alpha_i}$ : $\beta$ -arrestin: $V_2R$  following treatment with AVP. After AVP treatment, an increase  
 120 in the BRET ratio was observed in cells expressing β-arrestin-mKO, but not cytosolic mKO, which is similar to panel b.  
 121 e, Quantification of the  $G_{\alpha_i}$ :mKO: $V_2R$  complex formation in cells treated with either vehicle or AVP at a single five-  
 122 minute timepoint. f, Rearrangement of complex BRET components on G protein (LgBiT), β-arrestin (SmBiT), and V<sub>2</sub>R  
 123 (mKO). g, Complex BRET ratio of  $G_{\alpha_i}$ : $\beta$ -arrestin: $V_2R$  following AVP treatment. Rearrangement of complex BRET tags  
 124 increased the observed signal when compared to panel d. h, Five-minute quantification of  $G_{\alpha_i}$ : $\beta$ -arrestin: $V_2R$  complexes  
 125 relative to vehicle treatment. i, Similar experiment to panel g, except testing the ability of  $G_{\alpha_i}$ : $\beta$ -arrestin to form a  
 126 megaplex with the β<sub>2</sub>AR as opposed to the V<sub>2</sub>R. After isoproterenol (10 μM) treatment, an increase in the BRET ratio  
 127 was observed in cells expressing β<sub>2</sub>AR-mKO, but not cytosolic mKO. j, Five-minute quantification of  $G_{\alpha_i}$ : $\beta$ -arrestin:mKO  
 128 complexes induced by isoproterenol relative vehicle treatment. For kinetic experiments, \* $P < 0.05$  by two-way ANOVA,  
 129 Fischer's post hoc analysis with a significant difference between treatments; for five-minute quantification, \* $P < 0.05$  by  
 130 student's two-tailed t-test; for TSA \* $P < 0.05$  with Bonferroni post hoc analysis. Panels b-e, n=3 per condition; panels g-  
 131 j, n=4 per condition. Graphs show mean ± s.e.m. Cyto, cytoplasmic.

134 We next confirmed formation of  $G_{\alpha_i}$ : $\beta$ -arrestin: $V_2R$  megaplexes in reconstituted and  
 135 overexpressed systems. We first used purified megaplex components *in vitro* in a thermal stability  
 136 assay (TSA), which measures conformational stability of proteins upon thermal denaturation<sup>10</sup>. A

137 change in the melting profile of a given protein in the presence of another molecule relative to its  
 138 appropriate reference is an indication of binding/formation of a new complex. Consistent with the  
 139  $G_{\alpha i}$ : $\beta$ -arrestin: $V_2R$  interaction observed with complex BRET, a change in the melting profile was  
 140 observed when recombinant  $G_{\alpha i}$ -megaplex components were combined in the presence of a  
 141 stabilizing antibody fragment, Fab30<sup>11</sup> (Extended Data Fig. 2). In additional support of  $G_{\alpha i}$ : $\beta$ -  
 142 arrestin: $V_2R$  megaplexes, immunoprecipitation of  $\beta$ -arrestin yielded both  $V_2R$  and  $G_{\alpha i}$  association  
 143 when overexpressed in HEK 293 cells (Extended Data Fig. 3).  
 144

### 145 $G_{\alpha i}$ : $\beta$ -arrestin: $V_2R$ complexes form at the plasma membrane

146 We then visualized colocalization of  $G_{\alpha i}$ ,  $\beta$ -arrestin, and  $V_2R$  using confocal microscopy  
 147 (Fig. 2a). We validated the imaging parameters using single-colour controls to ensure accurate  
 148 quantification of each component channel (Extended Data Fig. 4). Colocalization of  $G_{\alpha i}$ ,  $\beta$ -arrestin,  
 149 and  $V_2R$  occurred after agonist treatment and was most prominent at the plasma membrane. Line  
 150 scan analyses demonstrated plasma membrane-localized puncta consisting of each megaplex  
 151 component after 5 minutes of agonist treatment (Fig. 2b,c). Thirty minutes after agonist treatment,  
 152 clear endosomal  $\beta$ -arrestin: $V_2R$  colocalization was observed that lacked substantial  $G_{\alpha i}$  (Fig. 2d).  
 153 These observations suggest that formation of  $G_{\alpha i}$ : $\beta$ -arrestin: $V_2R$  megaplexes occurs after agonist  
 154 treatment and is most prominent at the plasma membrane.

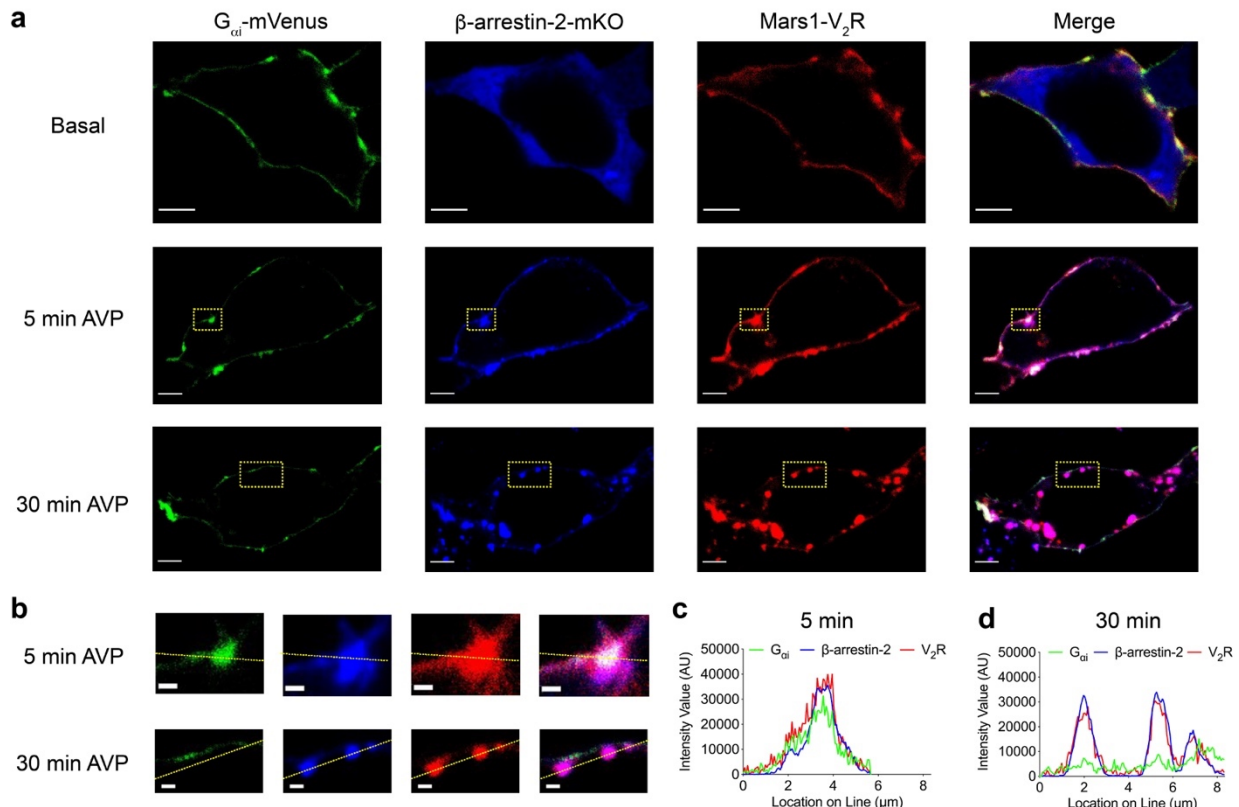

155 **Figure 2: Confocal microscopy of  $G_{\alpha i}$ : $\beta$ -arrestin: $V_2R$  complexes.** Confocal microscopy analysis of AVP-induced  
 156 complexes of  $G_{\alpha i}$ : $\beta$ -arrestin: $V_2R$  in HEK 293 cells transfected with mVenus-tagged  $G_{\alpha i}$ , mKO-tagged  $\beta$ -arrestin-2 and  
 157 Mars1-tagged  $V_2R$  **a**, preceding treatment (basal), at 5 min, or at 30 min. Substantial co-localization of  $G_{\alpha i}$ : $\beta$ -  
 158 arrestin: $V_2R$  was observed at 5 min, with less appreciated at 30 min. **b**, inset of images in **(a)**, scale bars, 1  $\mu$ m. **c**, line  
 159 scan analysis of 5-minute time point, demonstrating colocalization of fluorophores following AVP treatment. **d**, line-scan  
 160 analysis of 30-minute time point. Scale bars, 5  $\mu$ m. Data is representative of ten (basal), twenty (5 min) or fifteen (30  
 161 min) fields of view from three independent experiments. AVP was used at a concentration of 100 nM.  
 162  
 163  
 164

165 **G<sub>αi</sub> forms a complex with β-arrestin following GPCR agonist treatment**

166 The difference in magnitude of signal observed in complex BRET between G<sub>αi</sub> and G<sub>αs</sub>  
 167 megaplexes suggested distinct interaction orientations in these complexes. It was recently shown  
 168 that sustained G protein signalling exists at receptors following β-arrestin-dependent  
 169 internalization<sup>12</sup> and that β-arrestins are catalytically activated by an agonist-occupied receptor<sup>13</sup>.  
 170 We therefore hypothesized that other critical interactions between G proteins and β-arrestins  
 171 could be catalysed by agonist treatment of the V<sub>2</sub>R. We confirmed that the V<sub>2</sub>R primarily signals  
 172 via G<sub>αs</sub> (Fig. 3a) and recruits β-arrestin (Fig. 3b) following agonist treatment. Notably, V<sub>2</sub>R did not  
 173 canonically signal via G<sub>αi</sub>, even under these overexpressed conditions (Fig. 3a). Similarly, we  
 174 observed predominant G<sub>αs</sub> signalling and β-arrestin recruitment at the β<sub>2</sub>AR, another canonically  
 175 G<sub>αs</sub>-coupled receptor (Extended data Fig 5a,b).

176  
 177 We proceeded to interrogate the formation of G protein and β-arrestin scaffolds using split  
 178 luciferase technology<sup>9</sup> (nanoBiT) by fusing the smaller subunit (smBiT) of the split luciferase to β-  
 179 arrestin-2 and inserting the larger subunit (LgBiT) into a similar location in the four primary G<sub>α</sub>  
 180 families, G<sub>αs</sub>, G<sub>αi</sub>, G<sub>αq</sub>, and G<sub>α12</sub>. In direct contrast with the G<sub>α</sub> protein signalling, only G<sub>αi</sub>, but not

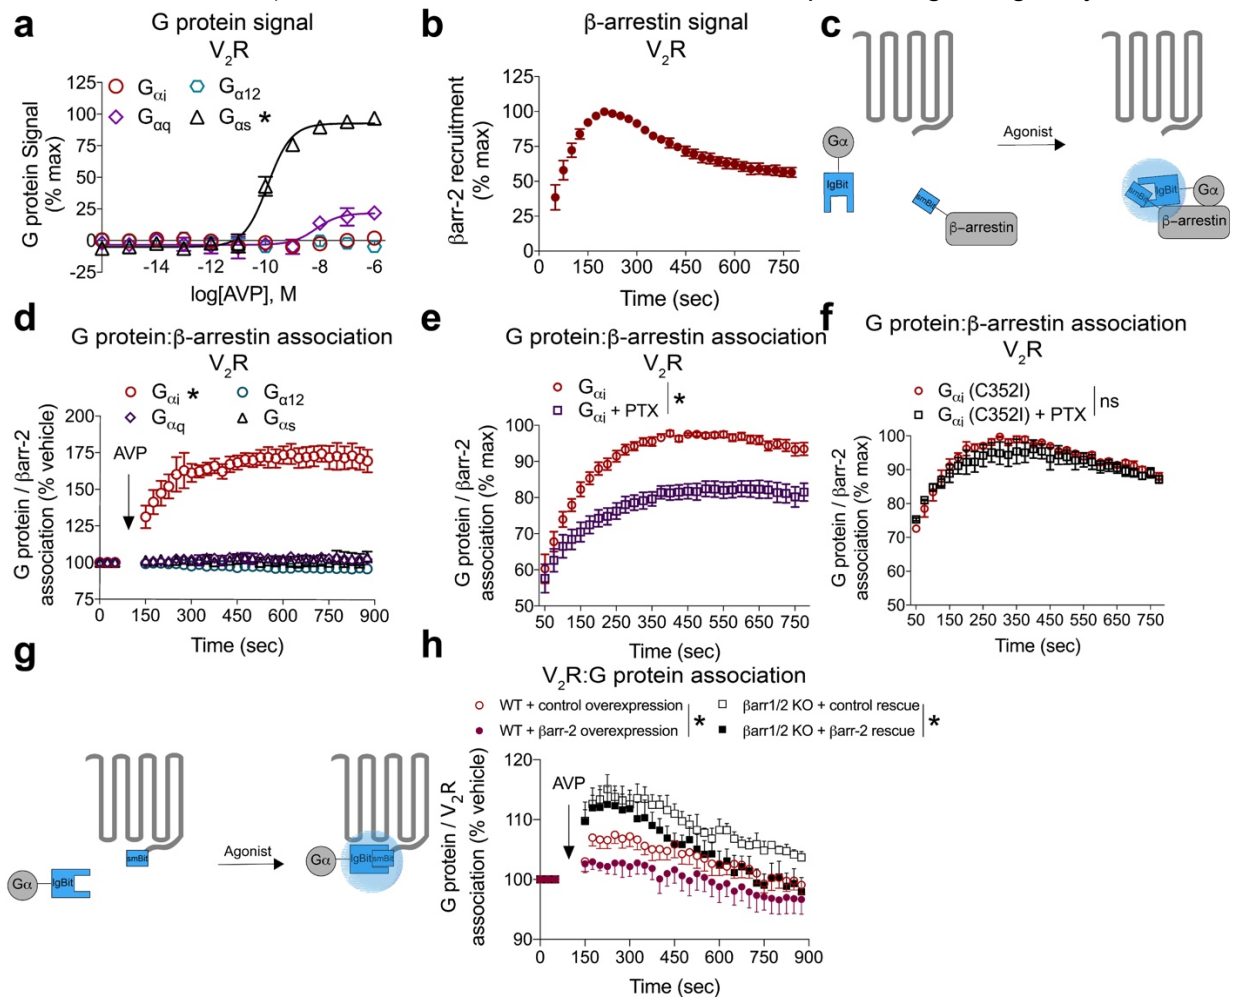

181 **Figure 3: The canonically G<sub>αs</sub>-coupled V<sub>2</sub>R forms only G<sub>αi</sub>:β-arrestin complexes following AVP treatment.**  
 182 **a**, Assessment of canonical G protein signalling following agonist treatment of the V<sub>2</sub>R. **b**, Assessment of canonical β-  
 183 arrestin-2 (smBiT) recruitment following agonist treatment of the V<sub>2</sub>R (LgBiT). **c**, Arrangement of luciferase fragments  
 184 on G protein (LgBiT) and β-arrestin (SmBiT) in this two component assay. Unlike figures 1 and 2, the receptor is not  
 185 tagged with a dipole acceptor. **d**, Effect of AVP (500 nM) treatment on cells overexpressing V<sub>2</sub>R in formation of G<sub>α</sub>:β-  
 186

187 arrestin-2 complexes. Only  $G_{\alpha i}$  formed an observable complex with  $\beta$ -arrestin-2. **e**, Effect of pertussis toxin pretreatment  
188 on  $G_{\alpha i}$ : $\beta$ -arrestin-2 complex formation. Data is normalized to maximal AVP-induced  $G_{\alpha i}$ : $\beta$ -arrestin-2 signal within each  
189 replicate. **f**, Effect of pertussis toxin pretreatment on  $G_{\alpha i}$  C352I mutant: $\beta$ -arrestin-2 complex formation. **g**, Arrangement  
190 of luciferase fragments on G protein (LgBiT) and  $V_2R$  (SmBiT) in this two component assay. **h**, Assessment of  $G_{\alpha i}$   
191 recruitment to the  $V_2R$  following AVP treatment in either WT cells or  $\beta$ -arrestin-1/2 knockout cells and overexpressing  
192 or rescuing, respectively, with  $\beta$ -arrestin-2 or a pcDNA empty vector control. For panel **a**, experiments were conducted  
193 using the TGF alpha shedding assay in ' $\Delta$ Gsix' HEK 293 cells. All other panels utilized WT HEK 293T cells  
194 overexpressing the indicated assay components. For panels **a** and **d**,  $*P < 0.05$  by two-way ANOVA, Fischer's post hoc  
195 analysis with a significant difference  $G_{\alpha i}$  subunit relative to all other  $G_{\alpha}$  subunits. For panel **h**,  $P < 0.05$  by two-way  
196 ANOVA, main effect of  $\beta$ -arr-2 expression. For panels **e** and **f**,  $*P < 0.05$  by two-way ANOVA, main effect of pertussis  
197 toxin treatment. ns, not significant. Panels **a,b,d,f**  $n=3$  per condition; for panel **h**,  $n=3-4$ ; for panel **e**  $n=8$ . Graphs show  
198 mean  $\pm$  s.e.m.  
199

200  $G_{\alpha s}$ ,  $G_{\alpha q}$  or  $G_{\alpha 12}$ , formed an observable complex with  $\beta$ -arrestin following  $V_2R$  treatment with AVP  
201 (Fig. 3d). Given that the  $V_2R$  is not canonically known to signal through  $G_{\alpha i}$ , this was surprising,  
202 especially given the absence of  $G_{\alpha i}$  signalling in our assay. Varying the amounts of  $G_{\alpha}$  subunit  
203 transfected by up to 10-fold did not increase the interaction between non- $G_{\alpha i}$  family members and  
204  $\beta$ -arrestin following agonist treatment of either the  $V_2R$  or  $\beta_2AR$  (Extended Data Fig. 6a-h).  
205 Furthermore,  $G_{\alpha i}$  isoforms 2 and 3, as well as the highly homologous  $G_{\alpha o}$ , were all recruited to  $\beta$ -  
206 arrestin-2 with varying efficacy following agonist treatment of the  $V_2R$  (Extended Data Fig. 7). A  
207 similar  $G_{\alpha i}$ -family interaction with  $\beta$ -arrestin-1 was also observed (Extended Data Fig. 8a,b).

208 The interaction between  $G_{\alpha i}$  and  $\beta$ -arrestin was sensitive to *pertussis toxin* (Fig. 3e), which  
209 promotes enzymatic ADP ribosylation of cysteine 352 in helix 5 of  $G_{\alpha i}$ <sup>14</sup>. Mutation of cysteine 352  
210 to isoleucine rescued the effect of *pertussis toxin* (Fig. 3f). Consistent with recent  
211 observations<sup>13,15</sup>, *pertussis toxin* pretreatment did not affect  $\beta$ -arrestin recruitment to either the  
212  $V_2R$  or  $\beta_2AR$  (Extended Data Fig. 9a,b), which suggests that *pertussis toxin* did not reduce the  
213 efficacy of  $G_{\alpha i}$ : $\beta$ -arrestin complex formation by interfering with  $\beta$ -arrestin recruitment to the  
214 receptor. In addition,  $\beta$ -arrestin was not necessary for the interaction of  $G_{\alpha i}$  with the  $V_2R$ , as  
215 previously validated HEK 293T cells lacking both  $\beta$ -arrestin-1 and  $\beta$ -arrestin-2 through  
216 CRISPR/Cas9 gene editing<sup>16</sup> recruited  $G_{\alpha i}$  following agonist treatment in both wild-type and  $\beta$ -  
217 arrestin1/2 knockout HEK 293T cell lines (Fig. 3g,h). Both  $\beta$ -arrestin-2 rescue in  $\beta$ -arrestin1/2  
218 knockout cells or  $\beta$ -arrestin-2 overexpression in wild-type cells attenuated  $G_{\alpha i}$ : $V_2R$  association  
219 relative to the cell-type control (Fig. 3h). As expected,  $G_{\alpha s}$  also associated with the  $V_2R$  following  
220 agonist treatment (Extended Data Fig. 10). These results are consistent with findings that  
221 canonically  $G_{\alpha s}$ -coupled receptors can also recruit  $G_{\alpha i}$ <sup>17</sup>, without necessarily activating canonical  
222  $G_{\alpha i}$  signalling.

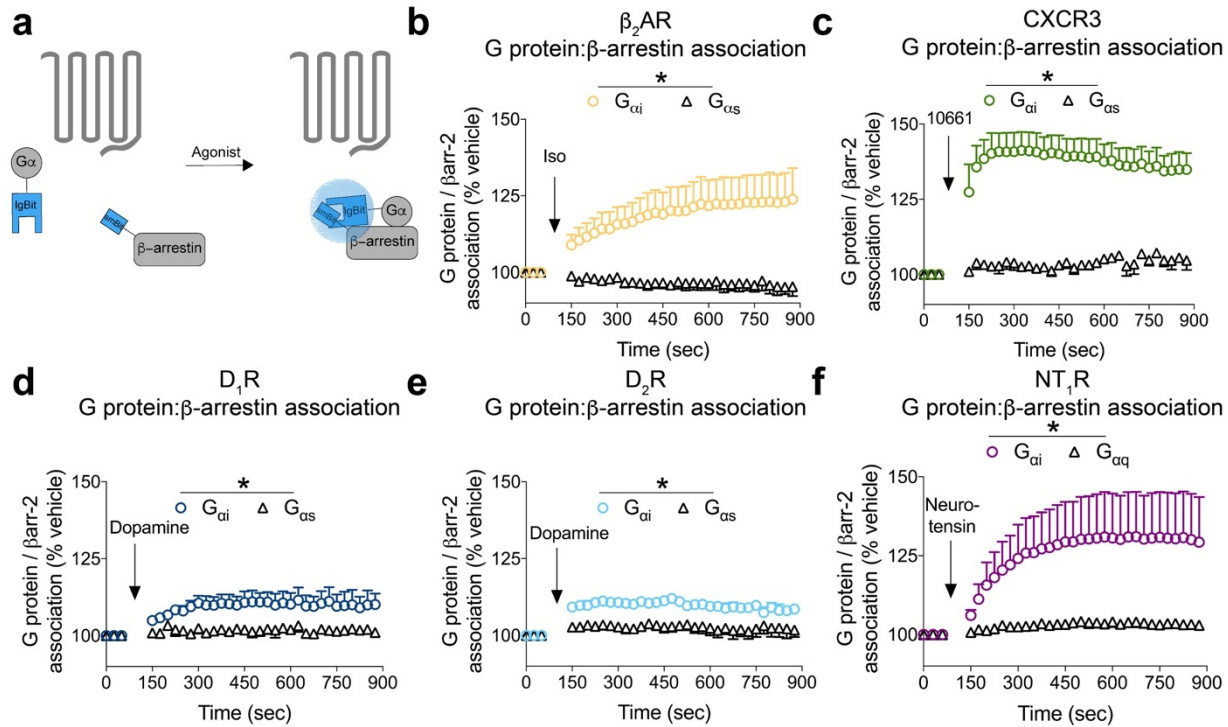

223  
224  
225  
226  
227  
228  
229  
230

**Figure 4: GPCRs form  $G_{\alpha i}$ : $\beta$ -arrestin complexes following agonist treatment regardless of canonical G protein coupling.** a, Arrangement of luciferase fragments on G protein (LgBiT) and  $\beta$ -arrestin (SmBiT) in this two component assay to assess the effect of the indicated agonist at forming  $G_{\alpha i}$ : $\beta$ -arrestin-2 complexes in cells overexpressing b,  $\beta_2$ AR (10  $\mu$ M isoproterenol); c, CXCR<sub>3</sub> (1  $\mu$ M VUF10661); d, D<sub>1</sub>R (500 nM dopamine); e, D<sub>2</sub>R (500 nM dopamine); f, NT<sub>1</sub>R (10 nM neurotensin). \* $P$ <0.05 by two-way ANOVA, main effect of  $G_{\alpha}$  subtype. For panel b, n=3-6; for panel c, n=3-4; for panel d, n=4, for panel e, n=3-4; for panel f, n=3 biological replicates per condition. Graphs show mean + s.e.m.

231  
232  
233  
234  
235  
236  
237

Given the paradoxical results of the  $G_{\alpha s}$ -coupled  $V_2$ R catalyzing an unique  $G_{\alpha i}$ : $\beta$ -arrestin complex, we proceeded to investigate if this phenomenon was generalizable to other GPCRs that canonically signal through different  $G_{\alpha}$  proteins. We selected five well-studied GPCRs: the  $\beta_2$ AR, CXCR<sub>3</sub>, NT<sub>1</sub>R, D<sub>1</sub>R, and D<sub>2</sub>R. Of these, only CXCR<sub>3</sub> and D<sub>2</sub>R canonically signal through  $G_{\alpha i}$ . The  $\beta_2$ AR and D<sub>1</sub>R canonically signal through  $G_{\alpha s}$ , and NT<sub>1</sub>R canonically signals through  $G_{\alpha q}$ . All five of these GPCRs formed  $G_{\alpha i}$ : $\beta$ -arrestin complexes following agonist treatment (Figure 4).

238

### Complexes of $G_{\alpha i}$ : $\beta$ -arrestin facilitate ERK scaffolding and signalling

239  
240  
241  
242  
243  
244  
245  
246  
247  
248  
249  
250  
251

We next tested if the  $G_{\alpha i}$ : $\beta$ -arrestin complex could scaffold ERK1/2 MAP kinases, which play critical roles in cell cycle regulation/proliferation and survival/apoptotic signalling<sup>18</sup>. A long held view is that GPCRs<sup>19</sup> regulate ERK activation by inducing ERK phosphorylation through separate G protein and  $\beta$ -arrestin signalling pathways. Over a decade of work demonstrates that  $\beta$ -arrestins regulate ERK signalling, however, recent evidence using CRISPR/Cas9 genome editing approaches demonstrated a lack of ERK signalling in the collective absence of functional G proteins. This has led some to suggest that  $\beta$ -arrestin signalling is “dispensable” for ERK activation<sup>20,21</sup>. In apparent contrast, other studies have demonstrated an essential role for  $\beta$ -arrestin in some pathways regulating ERK activation<sup>16</sup>. Interestingly, two decades of work has demonstrated that for  $G_{\alpha i}$  coupled receptors,  $\beta$ -arrestin-mediated ERK activation is invariably *pertussis toxin* sensitive<sup>22,23,24</sup>. However, how the  $G_{\alpha i}$  and  $\beta$ -arrestin transducers cooperate in this pathway has remained obscure.

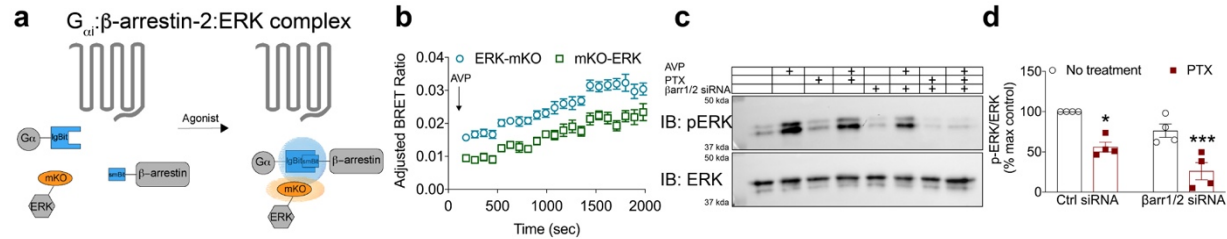

252  
253 **Figure 5:  $G_{\alpha i}$ : $\beta$ -arrestin scaffolds form functional complexes with ERK.** **a**, Arrangement of luciferase fragments  
254 and mKO acceptor fluorophore for complex BRET on G protein (LgBiT),  $\beta$ -arrestin (SmBiT), or ERK2 (mKO). **b**,  
255 Complex BRET association of  $G_{\alpha i}$ ,  $\beta$ -arrestin, and ERK2 in cells overexpressing untagged  $V_2R$  following treatment with  
256 AVP (500 nM). Data were normalized to both vehicle treatment and cytosolic mKO. **c**, Representative immunoblot of  
257 phospho and total ERK1/2 in ‘ $\Delta G_{\text{six}}$ ’ HEK 293 cells pretreated with PTX (200 ng/mL) and/or  $\beta$ arr1/2 siRNA, stimulated  
258 with either vehicle or AVP (500 nM). ERK1/2 phosphorylation was nearly eliminated in cells treated with both PTX and  
259  $\beta$ arr1/2 siRNA. **d**, Quantification of ERK immunoblots. \* $P < 0.05$ , \*\*\* $P < 0.001$ , two-way ANOVA with Bonferroni post  
260 hoc to no treatment, control siRNA group. The net BRET ratio of cytosolic mKO control was subtracted from the net  
261 BRET ratio of ERK-mKO to yield an adjusted BRET ratio that is the ordinate of panel **b**. Immunoblots are representative  
262 of three separate experiments. For panel **b**,  $n=5$ ; panel **d**,  $n=4$ . Immunoblot is representative of four experiments. PTX,  
263 pertussis toxin. Graphs show mean  $\pm$  s.e.m.  
264

265 To investigate if  $G_{\alpha i}$ : $\beta$ -arrestin complexes could directly scaffold to ERK downstream of  
266 the  $V_2R$ , we utilized complex BRET by tagging ERK at either its N- or -C terminus with the dipole  
267 acceptor mKO (Fig. 5a). Data were normalized to an untagged (cytosolic) mKO to account for  
268 changes in protein localization following agonist treatment. Agonist treatment of  $V_2R$  catalysed  
269 the formation of a  $G_{\alpha i}$ : $\beta$ -arrestin:ERK complex (Fig. 5b). The magnitude of the adjusted complex  
270 BRET ratio was dependent on the location of the mKO tag on ERK (ERK-mKO compared to mKO-  
271 ERK), consistent with orientation and distance dependence of resonance energy transfer between  
272 luciferase donor and mKO dipole acceptor. To selectively evaluate the contributions of  $G_{\alpha i}$   
273 signalling on ERK phosphorylation, we utilized ‘ $\Delta G_{\text{six}}$ ’ HEK 293 cells depleted via CRISPR/Cas9  
274 technology of  $G_{\alpha s}$ / $G_{\alpha \text{olf}}$ ,  $G_{\alpha q/11}$ , and  $G_{\alpha 12/13}$   $G_{\alpha}$  proteins previously reported and verified by western  
275 blot (Extended Data Fig. 11)<sup>20</sup>. Agonist treatment of these ‘ $\Delta G_{\text{six}}$ ’ HEK 293 cells overexpressing  
276  $V_2R$  robustly increased phosphorylated ERK (Fig. 5c,d). Pretreatment with *pertussis toxin*  
277 abrogated, but did not eliminate, ERK phosphorylation in ‘ $\Delta G_{\text{six}}$ ’ (Fig. 5c,d). Interestingly, in  
278 ‘ $\Delta G_{\text{six}}$ ’ cells, *pertussis toxin* pretreatment in combination with  $\beta$ -arrestin knockdown essentially  
279 eliminated ERK phosphorylation (Fig. 5c,d), consistent with functional coordination of  $G_{\alpha i}$  and  $\beta$ -  
280 arrestin. These results would not have been predicted due to the known  $G_{\alpha s}$ -regulated ERK  
281 phosphorylation downstream of  $V_2R$  and the demonstrated inability of  $V_2R$  to canonically signal  
282 through  $G_{\alpha i}$ . However, this result is consistent with a role of  $G_{\alpha i}$  coordination of  $\beta$ -arrestin signalling  
283 in this canonically  $G_{\alpha s}$ -coupled receptor.  
284

285 **A  $\beta$ -arrestin-biased agonist promotes formation of the  $G_{\alpha i}$ : $\beta$ -arrestin complex and displays**  
286 ***pertussis toxin*-sensitive cell migration**  
287



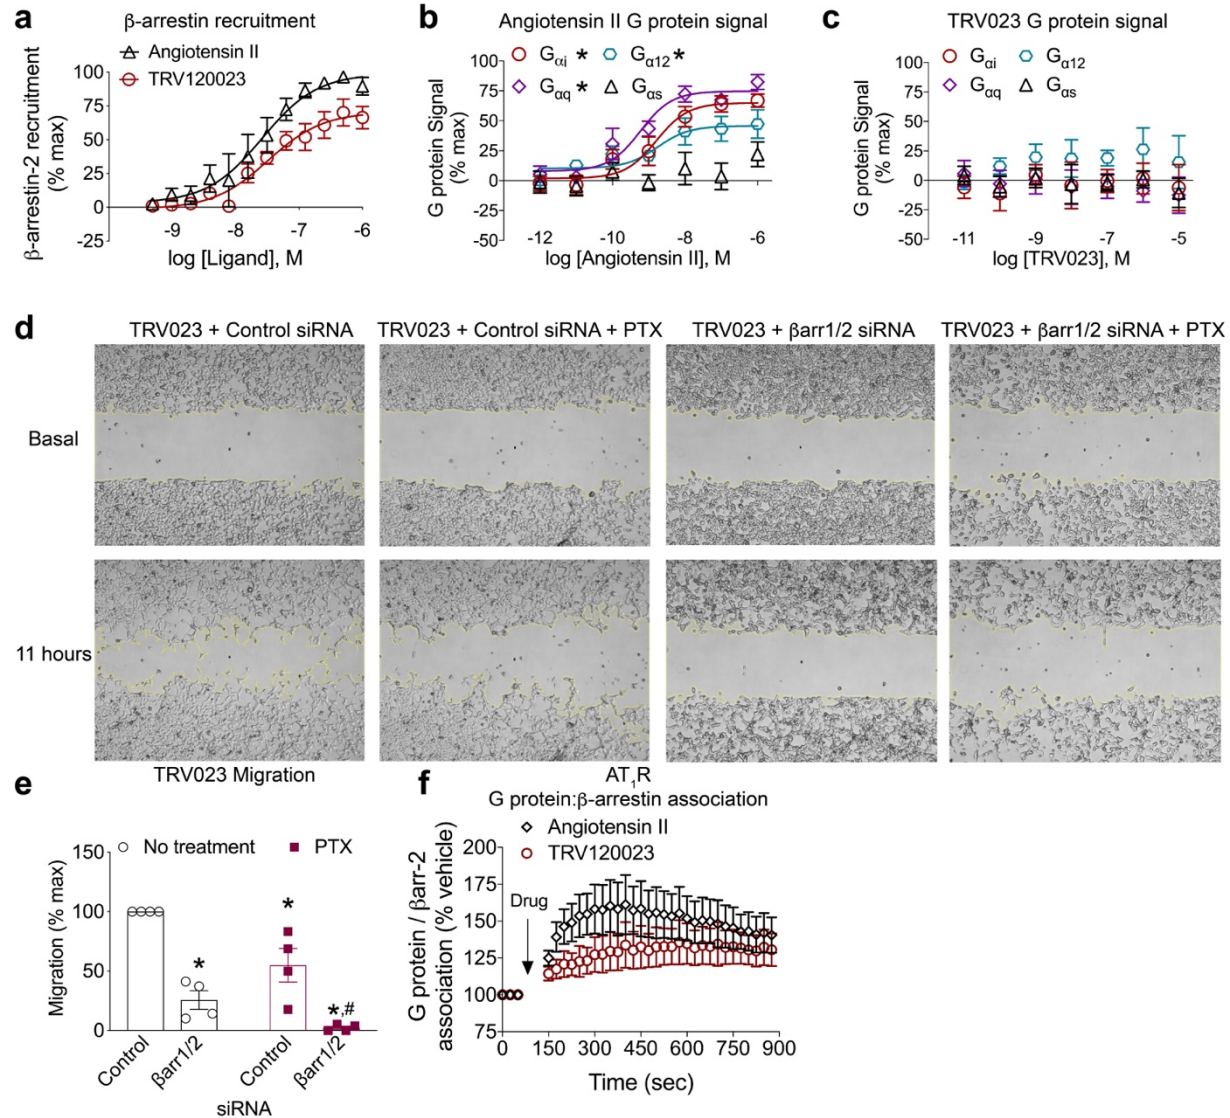

288  
 289 **Figure 6: Cell migration to the  $\beta$ -arrestin-biased Angiotensin ligand TRV120023 requires both  $G_{\alpha_i}$  and  $\beta$ -**  
 290 **arrestins. a**, BRET assay quantifying the recruitment of  $\beta$ -arrestin-2-YFP to  $AT_1R$ -RlucII following treatment with either  
 291 angiotensin II or TRV120023. Assessment of canonical G protein signalling at the Angiotensin II type 1 receptor ( $AT_1R$ )  
 292 following treatment with either the endogenous ligand, angiotensin II (b) or the previously characterised  $\beta$ -arrestin-  
 293 biased ligand TRV120023 (c). d, Representative images of the four TRV120023 migration conditions in HEK 293 cells  
 294 stably expressing  $AT_1R$ . e, Quantification of PTX pretreatment (200 ng/mL) and/or  $\beta$ -arr1/2 siRNA on TRV120023-  
 295 induced migration for the experiment shown in panel d. f, Split luciferase assay for monitoring G protein- $\beta$ -arrestin  
 296 association after treatment of  $AT_1R$  with either angiotensin II or TRV120023. \* $P < 0.05$ , two-way ANOVA with Bonferroni  
 297 post hoc to no treatment, control siRNA group. # $P < 0.05$ , two-way ANOVA with Bonferroni post hoc compared to control  
 298 siRNA, PTX pretreated group. For panel a,  $n = 4$  per condition, for panels b and c,  $n = 4-5$  per condition, for panels e and  
 299 f,  $n = 4$  per condition. Graphs show mean  $\pm$  s.e.m.

300 As described above it has long been clear that  $G_{\alpha_i}$  and  $\beta$ -arrestin somehow coordinate  
 301 their signalling to ERK downstream of canonically  $G_{\alpha_i}$  coupled receptors, whereas in the case of  
 302 GPCRs coupled to other G proteins these two signalling arms have appeared more  
 303 independent<sup>25</sup>. However, our observation that this  $G_{\alpha_i}$ : $\beta$ -arrestin complex forms downstream of  
 304 receptors not typically thought to interact with  $G_{\alpha_i}$  suggests that the formation of  $G_{\alpha_i}$ : $\beta$ -arrestin  
 305 complexes may be widespread. To further assess this model we utilized the angiotensin type 1  
 306 receptor ( $AT_1R$ )  $\beta$ -arrestin-biased agonist, TRV120023, which is well-established to have no

307 appreciable canonical G protein signalling but robustly recruits  $\beta$ -arrestin to the AT<sub>1</sub>R<sup>26,27</sup> (Fig.  
308 6a). This contrasts with the endogenous ligand of AT<sub>1</sub>R, Angiotensin II (AngII), which when  
309 applied to the AT<sub>1</sub>R signals through both G<sub>αq</sub> and G<sub>αi</sub> (Fig. 6b), as well as recruits  $\beta$ -arrestin (Fig  
310 6a). We verified that TRV120023 is a  $\beta$ -arrestin-biased agonist in our assays and that it had no  
311 appreciable ability to promote canonical G protein signalling through any of the four G<sub>α</sub>-family  
312 proteins tested (Fig. 6c) while strongly stimulating  $\beta$ -arrestin recruitment to the receptor (Fig. 6a).  
313 Because TRV120023 does not appreciably activate canonical G protein signalling, it would be  
314 predicted that it would not induce cell migration, a function thought to require canonical G protein  
315 signalling. However, not only did TRV120023 promote cellular migration, this migration was  
316 *pertussis toxin* sensitive, as pretreatment of cells with *pertussis toxin* reduced TRV120023-  
317 mediated migration by ~50%. Furthermore, inhibition of both G<sub>αi</sub> and  $\beta$ -arrestin through *pertussis*  
318 *toxin* pretreatment and siRNA knockdown of  $\beta$ -arrestin1/2 eliminated migration (Fig. 6d,e). Similar  
319 to all other receptors tested in the current study, both the endogenous agonist AngII and the  $\beta$ -  
320 arrestin-biased agonist TRV120023 induced G<sub>αi</sub>: $\beta$ -arrestin complex formation (Figure 6f).  
321  
322

## 323 Discussion

324 Our results reveal a new GPCR signalling paradigm in which GPCRs can promote  
325 formation of a G<sub>αi</sub>: $\beta$ -arrestin complex. The formation of this G<sub>αi</sub>: $\beta$ -arrestin complex was observed  
326 downstream of all receptors tested, even those receptors that do not canonically signal through  
327 G<sub>αi</sub>. A unique feature of our findings is the ability of a variety of GPCR ligands to drive formation  
328 of G<sub>αi</sub>: $\beta$ -arrestin complexes, even a  $\beta$ -arrestin-biased ligand that has little or no ability to promote  
329 G protein-mediated signalling. This suggests that a major driver of the association of  $\beta$ -arrestin  
330 with G<sub>αi</sub> is the GPCR-mediated recruitment of  $\beta$ -arrestin to the plasma membrane. The observed  
331 G<sub>αi</sub>: $\beta$ -arrestin scaffolds can include a GPCR or a signalling effector (ERK), or possibly both, and  
332 suggest that G<sub>αi</sub>: $\beta$ -arrestin scaffolds form functional signalling complexes. Remarkably, these  
333 signalling complexes are associated with ERK activation, even when the stimulatory GPCR ligand  
334 is incapable of activating canonical G<sub>αi</sub> signalling. Using HEK293 cells depleted of the G<sub>αs/q/12</sub>  
335 proteins and overexpressing the V<sub>2</sub>R, we demonstrate that AVP-induced ERK phosphorylation is  
336 nearly eliminated following G<sub>αi</sub> inhibition with *pertussis toxin* and siRNA knockdown of  $\beta$ -arrestins.  
337 Consistent with these results, we show that *pertussis toxin* impairs migration of cells treated with  
338 a  $\beta$ -arrestin-biased ligand, TRV120023. While these results are concordant with functional G<sub>αi</sub>: $\beta$ -  
339 arrestin scaffolds, it remains unclear how G<sub>αi</sub>: $\beta$ -arrestin complexes participate in the process of  
340 ERK activation and cell migration.  
341

342 This study bridges seemingly contradictory results concerning the interplay of G protein  
343 and  $\beta$ -arrestin signalling<sup>16,20,21</sup> by delineating a novel G<sub>αi</sub>: $\beta$ -arrestin scaffolding complex. A number  
344 of significant caveats must be considered when interpreting our results. Most importantly, these  
345 studies rely on the overexpression of components which have been genetically modified by  
346 insertion of various fluorescent reporter probes. For example, as demonstrated in Figure 1, a  
347 particular probe architecture can have significant impact on the intensity of the signal generated.  
348 Moreover, as a consequence of overexpression, interactions may be detected which would not  
349 be seen at physiologically relevant concentrations of these molecules. However, our control  
350 experiments, and our observation that the *lowest* concentrations of expression vector provide the  
351 *highest* signal-to-noise for G<sub>αi</sub>: $\beta$ -arrestin complex formation (Extended Data Fig. 6) support our  
352 interpretation that this complex formation is neither an artifact of probe orientation nor enhanced  
353 by protein overexpression. The presence of G<sub>αi</sub>: $\beta$ -arrestin association in orthogonal assays (TSA  
354 and coimmunoprecipitation) provides further support for the existence of G<sub>αi</sub>: $\beta$ -arrestin  
355 complexes. These experiments offer plausible mechanistic insight into initially paradoxical

356 observations that  $G_{\alpha i}$  can drive ERK phosphorylation downstream of the canonically  $G_{\alpha s}$ -coupled  
357  $V_2R$  and that *pertussis toxin* inhibits cell migration to a  $\beta$ -arrestin-biased agonist. Further studies  
358 examining both the biochemical mechanisms underlying, as well as additional functions of  $G_{\alpha i}$ : $\beta$ -  
359 arrestin scaffolds, will be required to address their physiological role and therapeutic implications.

## 360 **Methods**

### 361 **Cell culture and transfection.**

362 Human embryonic kidney cells (HEK 293, HEK 293T, Rockman  $\beta$ arrestin-1/2 HEK 293 knockout,  
363 and ' $\Delta$ Gsix' HEK 293) were maintained in minimum essential medium supplemented with 1% anti-  
364 anti and 10% fetal bovine serum. Rockman  $\beta$ arrestin-1/2 HEK 293 knockout were supplied by Dr.  
365 Howard Rockman and validated as previously described<sup>16</sup>. Cells were grown at 37 °C with  
366 humidified atmosphere of 5% CO<sub>2</sub>. For BRET and luminescence studies, HEK 293T cells were  
367 transiently transfected via an optimized calcium phosphate protocol as previously described. For  
368 immunoblot studies utilizing siRNA, HEK 293T cells were transiently transfected with  
369 Lipofectamine 3000 (ThermoFisher) according to manufacturer specifications. For TGF alpha  
370 shedding assay studies, ' $\Delta$ Gsix' HEK 293 cells were transfected using Fugene 6 (Promega)  
371 according to manufacturer specifications.

372

### 373 **Generation of constructs**

374 Cloning of constructs was performed using conventional techniques such as restriction  
375 enzyme/ligation methods. Linkers between the fluorescent proteins or luciferases and the cDNAs  
376 for receptors, transducers, kinases, or adaptor proteins were flexible (GGGGS) and ranged  
377 between 15-18 amino acids. See supplementary table for complete list of constructs used in  
378 manuscript.

379

### 380 **Split luciferase and complex BRET assays**

381 HEK293T cells seeded in 6-well plates were co-transfected with 500 ng of smBiT tagged  $\beta$ -  
382 arrestin-2, and either 250 ng of LgBiT tagged receptor or 2000 ng of untagged receptor and  
383 varying concentrations of LgBiT G $\alpha$  protein expression vector (most experiments were conducted  
384 between 50-200 ng of G $\alpha$  plasmid) or 2000ng of mKO tagged  $\beta$ -arrestin-2 and 500 ng of smBiT  
385 tagged V<sub>2</sub>R using a calcium phosphate protocol previously described<sup>28</sup>. Twenty-four hours post-  
386 transfection, cells were plated onto clear bottom, white-walled 96-well plates at 50,000-100,000  
387 cells/well in "BRET media" - clear minimum essential medium (GIBCO) supplemented with 2%  
388 FBS, 10 mM HEPES, 1x GlutaMax, and 1x Anti-Anti (GIBCO). Select cells were then treated  
389 overnight with *pertussis toxin* pretreatment at a final concentration of 200 ng/mL. The following  
390 day, media were removed, and cells were incubated at room temperature with 80  $\mu$ L of Hanks'  
391 balanced salt solution (GIBCO) supplemented with 20mM HEPES and 3  $\mu$ M coelenterazine-h for  
392 15 minutes. For luminescence split luciferase studies, plates were read with a BioTek Synergy  
393 Neo2 plate reader set at 37 °C with a 485 nm emission filter. Cells were stimulated with either  
394 vehicle (Hank's Balanced Salt Solution with 20 mM HEPES) or indicated concentration of agonist.  
395 For split luciferase luminescence experiments, plates were read both before and after ligand  
396 treatment to calculate  $\Delta$ net change in luminescence and subsequently normalized to vehicle  
397 treatment. For complex BRET experiments, plates were read on a Berthold Mithras LB940 using  
398 pre-warmed media and instrument at 37 °C using a standard Rluc emissions filter (480 nm) with  
399 a custom mKO 542 nm long-pass emission filter (Chroma Technology Co., Bellows Falls, VT).  
400 Readings were performed using a kinetic protocol with automatic injection of ligands as indicated  
401 in figures. The BRET ratio was calculated by dividing the mKO signal by the luciferase signal. For  
402 some experiments, a Net BRET ratio was calculated by subtracting the vehicle BRET ratio from  
403 the ligand stimulated BRET ratio, or an adjusted BRET ratio was calculated by subtracting the  
404 ligand treated cytosolic mKO signal from the ligand treated effector mKO signal, as indicated in  
405 figure legends.

406

### 407 **Immunoblotting**

408 Experiments were conducted as previously described<sup>28</sup>. Briefly, cells were serum starved for at  
409 least four hours, stimulated with the indicated ligand, subsequently washed 1x with ice-cold  
410 PBS, lysed in ice-cold RIPA buffer containing phosphatase and protease inhibitors (Phos-STOP

411 (Roche), cOmplete EDTA free (Sigma)) and rotated for forty-five minutes, and cleared of  
412 insoluble debris by centrifugation at  $>12,000 \times g$  ( $4^\circ\text{C}$ , 15 minutes), after which the supernatant  
413 was collected. Protein was resolved on SDS-10% polyacrylamide gels, transferred to  
414 nitrocellulose membranes, and immunoblotted with the indicated primary antibody overnight  
415 ( $4^\circ\text{C}$ ). phospho-ERK (Cell Signaling Technology, #9106) and total ERK (Millipore #06-182) were  
416 used to assess ERK activation. A1-CT antibody that recognizes both isoforms of  $\beta$ -arrestin was  
417 utilized<sup>16</sup>, with protein loading assessed by alpha-tubulin (Sigma #T6074). Galpha i-1 (13533,  
418 Santa Cruz Biotechnology), Galpha q/11/14 (365906, Santa Cruz Biotechnology), Galpha 12  
419 (515445, Santa Cruz Biotechnology), Galpha 13 (293424, Santa Cruz Biotechnology), Galpha  
420 s/olf (55545, Santa Cruz Biotechnology) antibodies were used to verify ' $\Delta\text{Gsix}$ ' HEK 293 cells.  
421 Horseradish peroxidase-conjugated polyclonal mouse anti-rabbit-IgG or anti-mouse-IgG were  
422 used as secondary antibodies. Immune complexes on nitrocellulose membrane were imaged by  
423 SuperSignal enhanced chemiluminescent substrate (Thermo Fisher). Following detection of  
424 phospho signal, nitrocellulose membranes were stripped and reblotted for total kinase signal. For  
425 quantification, phospho-protein signal was normalized to total protein signal using ImageLab (Bio-  
426 Rad) within the same blot. siRNA knockdown of  $\beta$ -arrestin-1 and  $\beta$ -arrestin-2 was conducted as  
427 previously described.

428

#### 429 **siRNA knockdown**

430 HEK 293T cells were transiently transfected with Lipofectamine 3000 (Thermo Fisher) per  
431 manufacturer specifications in a six-well tissue culture sterile plate with 1  $\mu\text{g}$  of receptor and 3.5 $\mu\text{g}$   
432 of either control or siRNA directed to  $\beta$ -arrestin-1/2 sequences ("wem2") as previously  
433 described<sup>16</sup>.

434

#### 435 **Wound-healing migration assay**

436 HEK 293T cells stably expressing the AT1R were utilized. Briefly, 70  $\mu\text{l}$  of cell suspension at a  
437 concentration of  $5 \times 10^5$  cells per mL was applied into each well of silicone inserts (Ibidi,  
438 Martinsried, Germany) on 24 well plate, and after 24 hrs incubation, the inserts were removed to  
439 create a wound field. The cells were incubated additionally for 12 hrs with 1  $\mu\text{M}$  of TRV120023  
440 and visualized with a Zeiss Axio Observer microscope (Carl Zeiss, Thornwood, NY). Wound  
441 healing was then analysed using ImageJ (NIH, Bethesda, MD) wound healing tool macros.

442

#### 443 **TGF-alpha shedding assay**

444 GPCR  $G_\alpha$  activity was assessed by the transforming growth factor- $\alpha$  (TGF- $\alpha$ ) shedding assay as  
445 previously described<sup>29</sup>. Briefly, HEK 293 cells lacking  $G_{\alpha q}$ ,  $G_{\alpha 11}$ ,  $G_{\alpha s/olf}$ , and  $G_{\alpha 12/13}$  (' $\Delta\text{Gsix}$ ' HEK  
446 293 cells) were transiently transfected with receptor, modified TGF- $\alpha$ -containing alkaline  
447 phosphatase (AP-TGF- $\alpha$ ), and the indicated  $G_\alpha$  subunit. Cells were reseeded twenty-four hours  
448 later in Hanks' Balanced Salt Solution (HBSS) (Gibco, Gaithersburg, MD) supplemented with  
449 5mM HEPES in a Costar 96-well plate (Corning Inc., Corning, NY). Cells were then stimulated  
450 with the indicated concentration of ligand for one hour. Conditioned media (CM) containing the  
451 shed AP-TGF- $\alpha$  was transferred to a new 96-well plate. Both the cell and CM plates were treated  
452 with para-nitrophenylphosphate (p-NPP, 100mM) (Sigma-Aldrich, St. Louis, MO) substrate for  
453 one hour, which is converted to para-nitrophenol (p-NP) by AP-TGF- $\alpha$ . This activity was measured  
454 at OD<sub>405</sub> in a Synergy Neo2 Hybrid Multi-Mode (BioTek, Winooski, VT) plate reader immediately  
455 after p-NPP addition and after one-hour incubation.  $G_\alpha$  activity was calculated by first determining  
456 p-NP amounts by absorbance through the following equation:

457  $100 * \left( \frac{\Delta\text{OD } 405 \text{ CM}}{\Delta\text{OD } 405 \text{ CM} + \Delta\text{OD } 405 \text{ cell}} \right)$ , where  $\Delta\text{OD } 405 = \text{OD } 405 \text{ 1 hour} - \text{OD } 405 \text{ 0 hour}$  and

458  $\Delta\text{OD } 405 \text{ cell}$  and  $\Delta\text{OD } 405 \text{ CM}$  represent the changes in absorbance after one hour in the cell  
459 and CM plates, respectively. Data were normalized to a single well that produced the maximal  
460 signal.

461

## 462 **Thermal Shift Assay**

463 Protein thermal melting shift experiments were performed using the StepOnePlus™ Real-Time  
464 PCR System (Applied Biosystems). Proteins were buffered in 20 mM HEPES pH 7.5, 100 mM  
465 NaCl, 4 mM MgCl<sub>2</sub>. β-arrestin-2, G<sub>αiβγ</sub>, V<sub>2</sub>Rpp, Fab30, and nonhydrolyzable GTP analog of GTP  
466 GMP-PNP were added at a final concentration of 5 μM, 10 μM, 30 μM, and 120 μM, respectively.  
467 All reactions were set up in a 96-well plate at final volumes of 20 μl and SYPRO Orange (Thermo  
468 Fisher Scientific) was added as a probe at a dilution of 1:1000. Excitation and emission filters  
469 for the SYPRO-Orange dye were set to 475 nm and 580 nm, respectively. The temperature was  
470 raised with a step of 0.5 °C per 30 second from 25 °C to 99 °C and fluorescence readings were  
471 taken at each interval. All measurements were carried out three times. Data were analysed using  
472 Applied Biosystems® Protein Thermal Shift™ Software. Expression and purification of  
473 heterotrimeric G protein was conducted as previously described<sup>30</sup>. In brief, Hive Five insect cells were  
474 infected with two viruses made from BestBac baculovirus system, one expressing human Gβ<sub>1</sub>-His6  
475 and G<sub>γ2</sub> and the other G<sub>αi1</sub>. Approximately forty-eight hours after infection the cells were harvested,  
476 solubilized, and heterotrimeric Gai purified using Ni-NTA chromatography and HiTrap Q sepharose  
477 anion exchange (GE Healthcare Life Sciences).

478

## 479 **Immunoprecipitation**

480 Immunoprecipitation was conducted as previously described<sup>31</sup>. Briefly, 4 μg of HA-V<sub>2</sub>R, 4 μg of  
481 G<sub>αi</sub>-GFP and 4 μg of pcDNA-ARRB1-Flag and/or pcDNA were transfected into HEK 293 cells  
482 seeded in 6 cm plates. Forty-eight hours post-transfection, after approximately 4 hours of serum  
483 starvation, cells were stimulated with AVP for 5 and 10 mins at 37 °C. Cells were then lysed on  
484 ice for 10 min in FLAG lysis buffer (50 mM Tris-HCl, pH 7.4, 1% Triton X-100, 150 mM NaCl, 1  
485 mM EDTA) supplemented with protease inhibitor cocktail tablet (Roche). Cell lysates were  
486 incubated with anti-FLAG M2 affinity gel (A2220, Sigma) overnight and immunoprecipitated  
487 ARRB1-FLAG were eluted with Flag peptides (F3290, Sigma). For primary antibody incubation,  
488 GFP polyclonal antibody (A6455, Invitrogen), HA-Tag (3724S, cell signaling biotechnology), and  
489 ANTI-FLAG M2 antibody (F3165, Sigma) were utilized.

490

## 491 **Confocal Microscopy**

492 HEK293T cells plated in fibronectin-coated 35 mm glass bottomed dishes (MatTek Corp. P35G-  
493 0-14-C) were transiently transfected via the calcium-phosphate method with DNA encoding G<sub>αi</sub>-  
494 mVenus (125 ng), βarr2-mKO (125 ng), and/or Mars1-V<sub>2</sub>R (500 ng). Mars1 binds a membrane  
495 impermeant fluorogen (SCi1) and induces its fluorescence in the near-infrared spectrum<sup>32</sup>. Cells  
496 were pulse labelled with SCi1 (diluted 1:5000 from 0.5 mg/mL stock) for 15 minutes before  
497 treatment with or without 100 nM AVP. Cells were then fixed at basal, 5 minutes and 30 minutes  
498 after treatment with 4% paraformaldehyde. Samples were then imaged with a Plan-Apochromat  
499 63x/1.4 Oil lens on a Zeiss LSM880 using corresponding laser lines to excite mVenus, mKO, or  
500 Mars1 (488nm, 561nm, 633nm respectively). Spectral gating via a 34 spectral array detector  
501 was performed using single colour transfection controls.

502

## 503 **Drugs**

504 VUF10661, AVP, dopamine, angiotensin II, neurotensin and isoproterenol were all purchased  
505 from Sigma-Aldrich (St. Louis, MO). VUF10661 and isoproterenol were dissolved in dimethyl  
506 sulfoxide (DMSO) to make stock solutions and stored in a desiccator cabinet. Stock solutions of  
507 AVP, angiotensin II, neurotensin, (Sigma-Aldrich) were prepared according to manufacturer  
508 specifications. TRV120023 was provided by Trevena (King of Prussia, PA). Stock solutions of  
509 neurotensin were made in 0.1% BSA in PBS. Dopamine was prepared fresh in BRET media  
510 supplemented with 0.03% ascorbic acid (Sigma-Aldrich). All drug dilutions were performed with

511 BRET media or cell culture media. PTX was obtained from List Biological Laboratories (Campbell,  
512 CA). All compound stocks were stored at  $-20^{\circ}\text{C}$  until use.

513

514 **Data availability**

515 The data sets generated for this study are available from the corresponding author upon  
516 reasonable request. All relevant data are included in the paper or the supplementary information.

517

518 **Statistical analyses**

519 Dose-response curves were fitted to a log agonist versus stimulus with three parameters (span,  
520 baseline, and EC50) with the minimum baseline corrected to zero using Prism 8.0 (GraphPad,  
521 San Diego, CA). For comparing ligands in concentration-response assays or time-response  
522 assays, a two-way ANOVA of ligand and concentration or ligand and time, respectively, was  
523 conducted. Unless otherwise noted, statistical tests were two-sided and corrected for multiple  
524 comparisons. Further details of statistical analysis and replicates are included in the figure  
525 captions.

526 **References**

- 527
- 528 1 Gilman, A. G. G proteins: transducers of receptor-generated signals. *Annu Rev Biochem*
- 529 **56**, 615-649, doi:10.1146/annurev.bi.56.070187.003151 (1987).
- 530 2 Lohse, M. J., Benovic, J. L., Codina, J., Caron, M. G. & Lefkowitz, R. J. beta-Arrestin: a
- 531 protein that regulates beta-adrenergic receptor function. *Science* **248**, 1547-1550 (1990).
- 532 3 Thomsen, A. R. *et al.* GPCR-G Protein-beta-Arrestin Super-Complex Mediates Sustained
- 533 G Protein Signaling. *Cell* **166**, 907-919, doi:10.1016/j.cell.2016.07.004 (2016).
- 534 4 Wehbi, V. L. *et al.* Noncanonical GPCR signaling arising from a PTH receptor-arrestin-
- 535 Gbetagamma complex. *Proceedings of the National Academy of Sciences of the United*
- 536 *States of America* **110**, 1530-1535, doi:10.1073/pnas.1205756110 (2013).
- 537 5 Oakley, R. H., Laporte, S. A., Holt, J. A., Barak, L. S. & Caron, M. G. Association of
- 538 beta-arrestin with G protein-coupled receptors during clathrin-mediated endocytosis
- 539 dictates the profile of receptor resensitization. *The Journal of biological chemistry* **274**,
- 540 32248-32257 (1999).
- 541 6 Tohgo, A. *et al.* The stability of the G protein-coupled receptor-beta-arrestin interaction
- 542 determines the mechanism and functional consequence of ERK activation. *The Journal of*
- 543 *biological chemistry* **278**, 6258-6267, doi:10.1074/jbc.M212231200 (2003).
- 544 7 Urizar, E. *et al.* CODA-RET reveals functional selectivity as a result of GPCR
- 545 heteromerization. *Nat Chem Biol* **7**, 624-630, doi:10.1038/nchembio.623 (2011).
- 546 8 Cotnoir-White, D. *et al.* Monitoring ligand-dependent assembly of receptor ternary
- 547 complexes in live cells by BRETfect. *Proceedings of the National Academy of Sciences*
- 548 *of the United States of America* **115**, E2653-E2662, doi:10.1073/pnas.1716224115
- 549 (2018).
- 550 9 Dixon, A. S. *et al.* NanoLuc Complementation Reporter Optimized for Accurate
- 551 Measurement of Protein Interactions in Cells. *ACS Chem Biol* **11**, 400-408,
- 552 doi:10.1021/acschembio.5b00753 (2016).
- 553 10 Renaud, J. P. *et al.* Biophysics in drug discovery: impact, challenges and opportunities.
- 554 *Nat Rev Drug Discov* **15**, 679-698, doi:10.1038/nrd.2016.123 (2016).
- 555 11 Shukla, A. K. *et al.* Structure of active beta-arrestin-1 bound to a G-protein-coupled
- 556 receptor phosphopeptide. *Nature* **497**, 137-141, doi:10.1038/nature12120 (2013).
- 557 12 Irannejad, R. *et al.* Functional selectivity of GPCR-directed drug action through location
- 558 bias. *Nat Chem Biol* **13**, 799-806, doi:10.1038/nchembio.2389 (2017).
- 559 13 Eichel, K. *et al.* Catalytic activation of beta-arrestin by GPCRs. *Nature* **557**, 381-386,
- 560 doi:10.1038/s41586-018-0079-1 (2018).
- 561 14 West, R. E., Jr., Moss, J., Vaughan, M., Liu, T. & Liu, T. Y. Pertussis toxin-catalyzed
- 562 ADP-ribosylation of transducin. Cysteine 347 is the ADP-ribose acceptor site. *The*
- 563 *Journal of biological chemistry* **260**, 14428-14430 (1985).
- 564 15 Pack, T. F., Orlen, M. I., Ray, C., Peterson, S. M. & Caron, M. G. The dopamine D2
- 565 receptor can directly recruit and activate GRK2 without G protein activation. *J Biol Chem*
- 566 **293**, 6161-6171, doi:10.1074/jbc.RA117.001300 (2018).
- 567 16 Luttrell, L. M. *et al.* Manifold roles of beta-arrestins in GPCR signaling elucidated with
- 568 siRNA and CRISPR/Cas9. *Sci Signal* **11**, doi:10.1126/scisignal.aat7650 (2018).
- 569 17 Wan, Q. *et al.* Mini G protein probes for active G protein-coupled receptors (GPCRs) in
- 570 live cells. *The Journal of biological chemistry* **293**, 7466-7473,
- 571 doi:10.1074/jbc.RA118.001975 (2018).



- 572 18 Pearson, G. *et al.* Mitogen-activated protein (MAP) kinase pathways: regulation and  
573 physiological functions. *Endocr Rev* **22**, 153-183, doi:10.1210/edrv.22.2.0428 (2001).
- 574 19 Smith, J. S., Lefkowitz, R. J. & Rajagopal, S. Biased signalling: from simple switches to  
575 allosteric microprocessors. *Nat Rev Drug Discov* **17**, 243-260, doi:10.1038/nrd.2017.229  
576 (2018).
- 577 20 Grundmann, M. *et al.* Lack of beta-arrestin signaling in the absence of active G proteins.  
578 *Nat Commun* **9**, 341, doi:10.1038/s41467-017-02661-3 (2018).
- 579 21 O'Hayre, M. *et al.* Genetic evidence that beta-arrestins are dispensable for the initiation of  
580 beta2-adrenergic receptor signaling to ERK. *Sci Signal* **10**, doi:10.1126/scisignal.aal3395  
581 (2017).
- 582 22 Wang, J. *et al.* Galphai is required for carvedilol-induced beta1 adrenergic receptor beta-  
583 arrestin biased signaling. *Nat Commun* **8**, 1706, doi:10.1038/s41467-017-01855-z (2017).
- 584 23 Hawes, B. E., van Biesen, T., Koch, W. J., Luttrell, L. M. & Lefkowitz, R. J. Distinct  
585 pathways of Gi- and Gq-mediated mitogen-activated protein kinase activation. *The*  
586 *Journal of biological chemistry* **270**, 17148-17153 (1995).
- 587 24 Hordijk, P. L., Verlaan, I., van Corven, E. J. & Moolenaar, W. H. Protein tyrosine  
588 phosphorylation induced by lysophosphatidic acid in Rat-1 fibroblasts. Evidence that  
589 phosphorylation of map kinase is mediated by the Gi-p21ras pathway. *The Journal of*  
590 *biological chemistry* **269**, 645-651 (1994).
- 591 25 Smith, J. S. & Rajagopal, S. The beta-Arrestins: Multifunctional Regulators of G Protein-  
592 coupled Receptors. *The Journal of biological chemistry* **291**, 8969-8977,  
593 doi:10.1074/jbc.R115.713313 (2016).
- 594 26 Violin, J. D. *et al.* Selectively engaging beta-arrestins at the angiotensin II type 1 receptor  
595 reduces blood pressure and increases cardiac performance. *The Journal of pharmacology*  
596 *and experimental therapeutics* **335**, 572-579, doi:10.1124/jpet.110.173005 (2010).
- 597 27 Strachan, R. T. *et al.* Divergent transducer-specific molecular efficacies generate biased  
598 agonism at a G protein-coupled receptor (GPCR). *The Journal of biological chemistry*  
599 **289**, 14211-14224, doi:10.1074/jbc.M114.548131 (2014).
- 600 28 Smith, J. S. *et al.* Biased agonists of the chemokine receptor CXCR3 differentially  
601 control chemotaxis and inflammation. *Sci Signal* **11**, doi:10.1126/scisignal.aaq1075  
602 (2018).
- 603 29 Inoue, A. *et al.* TGFalpha shedding assay: an accurate and versatile method for detecting  
604 GPCR activation. *Nat Methods* **9**, 1021-1029, doi:10.1038/nmeth.2172 (2012).
- 605 30 Gregorio, G. G. *et al.* Single-molecule analysis of ligand efficacy in beta2AR-G-protein  
606 activation. *Nature* **547**, 68-73, doi:10.1038/nature22354 (2017).
- 607 31 Ma, Z., Chalkley, R. J. & Vosseller, K. Hyper-O-GlcNAcylation activates nuclear factor  
608 kappa-light-chain-enhancer of activated B cells (NF-kappaB) signaling through interplay  
609 with phosphorylation and acetylation. *The Journal of biological chemistry* **292**, 9150-  
610 9163, doi:10.1074/jbc.M116.766568 (2017).
- 611 32 Snyder, J. C. *et al.* A rapid and affordable screening platform for membrane protein  
612 trafficking. *BMC Biol* **13**, 107, doi:10.1186/s12915-015-0216-3 (2015).
- 613  
614

615 **Acknowledgements**

616 The authors recognize consequential contributions from R. J. Lefkowitz for his helpful comments  
617 and suggestions regarding experimental design, laboratory resources (including constructs  
618 outlined in the methods section), data interpretation, and edits to the text throughout multiple  
619 drafts. The authors thank N. Nazo for administrative assistance; L. Luttrell, S. Shenoy, C. Chavkin,  
620 G. Viswanathan and J. Silverman for helpful discussion and thoughtful feedback; M. Orlen and D.  
621 Eiger for technical assistance; S. Shenoy and N. Freedman for the use of laboratory equipment,  
622 and Dr. H Rockman for Rockman  $\beta$ -arrestin-1/2 KO HEK293 cells. This work was supported by  
623 T32GM7171 (J.S.S.), the Duke Medical Scientist Training Program (J.S.S.), F31DA041160  
624 (T.F.P.), PRIME JP17gm5910013 (A.I.), the LEAP JP17gm0010004 from the Japan Agency for  
625 Medical Research and Development (A.I.), the JSPS KAKENHI (A.I.), 17K08264R37MH073853  
626 (M.G.C.), 1R01GM122798-01A1 (S.R.), K08HL114643-01A1, (S.R.), Burroughs Wellcome  
627 Career Award for Medical Scientists (S.R.).

628  
629 **Author Contributions:** J.S.S. and T.F.P. contributed equally to this work. J.S.S. and T.F.P.  
630 conceived of the study and designed, generated, and validated receptor and  $\beta$ -arrestin split  
631 luciferase and mKO constructs. A.I. designed, generated, and validated all G protein split  
632 luciferase constructs and generated 'ΔGsix' cells. J.S.S., T.F.P., C.L., K.Z., I.C., X.X., Z.M., I.M.L.  
633 performed cell-based experiments. X.X. performed the migration assay and analysed the data.  
634 A.W.K. performed and analysed TSA experiments. D.P.S. contributed purified protein for TSA  
635 experiments. L.K.R and J.C.S performed and analysed confocal experiments. J.S.S., T.F.P., and  
636 S.R. analysed all other data. J.S.S., T.F.P., M.G.C, and S.R. wrote the paper. All authors  
637 discussed the results and commented on the manuscript.

638  
639 **Author Information:**

640 Correspondence and requests for materials should be addressed to  
641 [sudarshan.rajagopal@duke.edu](mailto:sudarshan.rajagopal@duke.edu)

642  
643

644  
645

**Table 1: Constructs Used.**

\* Inoue et al, Illuminating G protein coupling selectivity of GPCRs, submitted.

| Name              | Main Component                              | Addition 1      | Addition 2    | N-term Linker              | C-term Linker             | Source               |
|-------------------|---------------------------------------------|-----------------|---------------|----------------------------|---------------------------|----------------------|
| V2R               | human vasopressin 2 receptor                | N-term 3xHA-tag |               | none                       | none                      | Caron Lab Stocks     |
| β2AR              | human beta 2 adrenergic receptor            | N-term 3xHA-tag |               | none                       | none                      | Caron Lab Stocks     |
| D1R               | mouse dopamine d1 receptor                  | N-term 3xHA-tag |               | none                       | none                      | Caron Lab Stocks     |
| D2R               | mouse dopamine d2 receptor                  | N-term 3xHA-tag |               | none                       | none                      | Caron Lab Stocks     |
| CXCR3             | human C-X-C motif chemokine receptor 3      |                 |               | none                       | none                      | Rajagopal Lab Stocks |
| AT1R              | human angiotensin II receptor type 1        | N-term 3xHA-tag |               | none                       | none                      | Lefkowitz Lab Stocks |
| AT1R-RlucII       | human angiotensin II receptor type 1        | N-term 3xHA-tag | C-term RlucII | none                       |                           | This work            |
| V2R-LgBiT         | human vasopressin 2 receptor                | N-term 3xHA-tag | C-term LgBiT  | none                       | TGGGGSG<br>GGGSGGG<br>GGS | This work            |
| V2R-SmBiT         | human vasopressin 2 receptor                | N-term 3xHA-tag | C-term SmBiT  | none                       | TGGGGSG<br>GGGSGGG<br>GGS | This work            |
| β2AR-LgBiT        | human beta 2 adrenergic receptor            | N-term 3xHA-tag | C-term LgBiT  | none                       | TGGGGSG<br>GGGSGGG<br>GGS | This work            |
| SmBiT-βarr2       | mouse beta-arrestin 2                       | N-term SmBiT    |               | GTGGGGS<br>GGGGSGG<br>GGGS | none                      | This work            |
| SmBiT-βarr1       | rat beta-arrestin 1                         | N-term SmBiT    |               | GTGGGGS<br>GGGGSGG<br>GGGS | none                      | This work            |
| LgBiT-GNAS        | human stimulatory G protein                 | LgBiT           |               | none                       | none                      | Inoue Lab*           |
| LgBiT-GNAI1       | human inhibitory G protein 1                | LgBiT           |               | none                       | none                      | Inoue Lab*           |
| LgBiT-GNAI1 C352I | human inhibitory G protein 1 C352I          | LgBiT           |               | none                       | none                      | Inoue Lab*           |
| LgBiT-GNAI2       | human inhibitory G protein 2                | LgBiT           |               | none                       | none                      | Inoue Lab*           |
| LgBiT-GNAI3       | human inhibitory G protein 3                | LgBiT           |               | none                       | none                      | Inoue Lab*           |
| LgBiT-GNAQ        | human Gq protein                            | LgBiT           |               | none                       | none                      | Inoue Lab*           |
| LgBiT-GNA12       | human G12 protein                           | LgBiT           |               | none                       | none                      | Inoue Lab*           |
| V2R-mKO           | human vasopressin 2 receptor                | N-term 3xHA-tag | C-term mKO    | none                       | TGGGGSG<br>GGGSGGG<br>GGS | This work            |
| β2AR-mKO          | human beta 2 adrenergic receptor            | N-term 3xHA-tag | C-term mKO    | none                       | TGGGGSG<br>GGGSGGG<br>GGS | This work            |
| βarr2-mKO         | mouse beta-arrestin 2                       | C-term mKO      |               | none                       | RARDPPVA<br>T             | This work            |
| βarr2-YFP         | mouse beta-arrestin 2                       | C-term YFP      |               | none                       | RARDPPVA<br>T             | Caron Lab            |
| Erk2-mKO          | rat extracellular regulated kinase 2 (Erk2) | C-term mKO      |               | none                       | SDPGG                     | This work            |
| mKO-Erk2          | rat extracellular regulated kinase 2 (Erk2) | N-term mKO      |               | QAS                        | none                      | This work            |
| mKO               | monomeric kusabira orange (cytosolic)       | none            | none          | none                       | none                      | This work            |
| GNAI1-GFP         | human inhibitory G protein 1                | GFP             |               |                            |                           | Lefkowitz lab stocks |
| FLAG-βarr1        | rat beta-arrestin 1                         | FLAG tag        |               | none                       | none                      | Lefkowitz lab stocks |
| Mars1-V2R         | human vasopressin 2 receptor                | Mars1           |               |                            | none                      | Synder lab stocks    |
| GNAI1-mVenus      | human inhibitory G protein 1                | mVenus          |               | none                       | none                      | This work            |

646 **Figure 1: Formation of G protein: $\beta$ -arrestin:GPCR megaplexes.** **a**, Arrangement of luciferase  
647 fragments and mKO acceptor fluorophore for complex BRET on G protein (LgBiT),  $\beta$ -arrestin  
648 (mKO), and V<sub>2</sub>R (SmBiT). HEK 293T cells were transiently transfected with the indicated receptor  
649 and assay components and stimulated with the indicated agonist or vehicle. **b**, Complex BRET  
650 ratio of G<sub>αs</sub>: $\beta$ -arrestin:V<sub>2</sub>R following AVP (500 nM) treatment. After AVP treatment, an increase in  
651 the BRET ratio was observed in cells expressing  $\beta$ -arrestin-mKO, but not cytosolic mKO. **c**,  
652 Quantification of G<sub>αs</sub>:mKO:V<sub>2</sub>R complex formation in cells treated with either vehicle or AVP at a  
653 single five-minute timepoint. Full kinetic data is available in the extended data. **d**, Similar  
654 experiment to panel **b**, except testing the ability of G<sub>αi</sub> to form a ‘megaplex.’ Complex BRET ratio  
655 of G<sub>αi</sub>: $\beta$ -arrestin:V<sub>2</sub>R following treatment with AVP. After AVP treatment, an increase in the BRET  
656 ratio was observed in cells expressing  $\beta$ -arrestin-mKO, but not cytosolic mKO, which is similar to  
657 panel **b**. **e**, Quantification of the G<sub>αi</sub>:mKO:V<sub>2</sub>R complex formation in cells treated with either vehicle  
658 or AVP at a single five-minute timepoint. **f**, Rearrangement of complex BRET components on G  
659 protein (LgBiT),  $\beta$ -arrestin (SmBiT), and V<sub>2</sub>R (mKO). **g**, Complex BRET ratio of G<sub>αi</sub>: $\beta$ -arrestin:V<sub>2</sub>R  
660 following AVP treatment. Rearrangement of complex BRET tags increased the observed signal  
661 when compared to panel **d**. **h**, Five-minute quantification of G<sub>αi</sub>: $\beta$ -arrestin:V<sub>2</sub>R complexes relative  
662 to vehicle treatment. **i**, Similar experiment to panel **g**, except testing the ability of G<sub>αi</sub>: $\beta$ -arrestin to  
663 form a megaplex with the  $\beta_2$ AR as opposed to the V<sub>2</sub>R. After isoproterenol (10  $\mu$ M) treatment, an  
664 increase in the BRET ratio was observed in cells expressing  $\beta_2$ AR-mKO, but not cytosolic mKO.  
665 **j**, Five-minute quantification of G<sub>αi</sub>: $\beta$ -arrestin:mKO complexes induced by isoproterenol relative  
666 vehicle treatment. For kinetic experiments, \**P*<0.05 by two-way ANOVA, Fischer’s post hoc  
667 analysis with a significant difference between treatments; for five-minute quantification, \**P*<0.05  
668 by student’s two-tailed t-test; for TSA \**P*<0.05 with Bonferroni post hoc analysis. Panels b-e, n=3  
669 per condition; panels g-j, n=4 per condition. Graphs show mean  $\pm$  s.e.m. Cyto, cytoplasmic.  
670

671 **Figure 2: Confocal microscopy of G<sub>αi</sub>: $\beta$ -arrestin:V<sub>2</sub>R complexes.** Confocal microscopy  
672 analysis of AVP-induced mKO complexes of G<sub>αi</sub>: $\beta$ -arrestin:V<sub>2</sub>R in HEK 293 cells transfected with  
673 mVenus-tagged G<sub>αi</sub>, mKO-tagged  $\beta$ -arrestin-2 and Mars1-tagged V<sub>2</sub>R **a**, preceding treatment  
674 (basal), at 5 min, or at 30 min. Substantial co-localization of G<sub>αi</sub>: $\beta$ -arrestin:V<sub>2</sub>R was observed at 5  
675 min, with less appreciated at 30 min. **b**, inset of images in (**a**), scale bars, 1  $\mu$ m. **c**, line scan  
676 analysis of 5-minute time point, demonstrating colocalization of fluorophores following AVP  
677 treatment. **d**, line-scan analysis of 30-minute time point. Scale bars, 5  $\mu$ m. Data is representative  
678 of ten (basal), twenty (5 min) or fifteen (30 min) fields of view from three independent experiments.  
679 AVP was used at a concentration of 100 nM.  
680

681 **Figure 3: The canonically G<sub>αs</sub>-coupled V<sub>2</sub>R forms only G<sub>αi</sub>: $\beta$ -arrestin complexes following**  
682 **AVP treatment.** **a**, Assessment of canonical G protein signalling following agonist treatment of  
683 the V<sub>2</sub>R. **b**, Assessment of canonical  $\beta$ -arrestin-2 (smBiT) recruitment following agonist treatment  
684 of the V<sub>2</sub>R (LgBiT). **c**, Arrangement of luciferase fragments on G protein (LgBiT) and  $\beta$ -arrestin  
685 (SmBiT) in this two component assay. Unlike figures 1 and 2, the receptor is not tagged with a  
686 dipole acceptor. **d**, Effect of AVP (500 nM) treatment on cells overexpressing V<sub>2</sub>R in formation of  
687 G<sub>αi</sub>: $\beta$ -arrestin-2 complexes. Only G<sub>αi</sub> formed an observable complex with  $\beta$ -arrestin-2. **e**, Effect of  
688 pertussis toxin pretreatment on G<sub>αi</sub>: $\beta$ -arrestin-2 complex formation. Data is normalized to maximal  
689 AVP-induced G<sub>αi</sub>: $\beta$ -arrestin-2 signal within each replicate. **f**, Effect of pertussis toxin pretreatment  
690 on G<sub>αi</sub> C352I mutant: $\beta$ -arrestin-2 complex formation. **g**, Arrangement of luciferase fragments on  
691 G protein (LgBiT) and V<sub>2</sub>R (SmBiT) in this two component assay. **h**, Assessment of G<sub>αi</sub> recruitment  
692 to the V<sub>2</sub>R following AVP treatment in either WT cells or  $\beta$ -arrestin-1/2 knockout cells and  
693 overexpressing or rescuing, respectively, with  $\beta$ -arrestin-2 or a pcDNA empty vector control. For  
694 panel **a**, experiments were conducted using the TGF alpha shedding assay in ‘ $\Delta$ Gsix’ HEK 293

695 cells. All other panels utilized WT HEK 293T cells overexpressing the indicated assay  
696 components. For panels **a** and **d**,  $*P < 0.05$  by two-way ANOVA, Fischer's post hoc analysis with  
697 a significant difference  $G_{\alpha i}$  subunit relative to all other  $G_{\alpha}$  subunits. For panel **h**,  $P < 0.05$  by two-  
698 way ANOVA, main effect of  $\beta$ -arr-2 expression. For panels **e** and **f**,  $*P < 0.05$  by two-way ANOVA,  
699 main effect of pertussis toxin treatment. ns, not significant. Panels **a, b, d, f**  $n = 3$  per condition; for  
700 panel **h**,  $n = 3-4$ ; for panel **e**  $n = 8$ . Graphs show mean  $\pm$  s.e.m.

701  
702

703 **Figure 4: GPCRs form  $G_{\alpha i}$ : $\beta$ -arrestin complexes following agonist treatment regardless of**  
704 **canonical G protein coupling.** **a**, Arrangement of luciferase fragments on G protein (LgBiT) and  
705  $\beta$ -arrestin (SmBiT) in this two component assay to assess the effect of the indicated agonist at  
706 forming  $G_{\alpha i}$ : $\beta$ -arrestin-2 complexes in cells overexpressing **b**,  $\beta_2$ AR (10  $\mu$ M isoproterenol); **c**,  
707 CXCR<sub>3</sub> (1  $\mu$ M VUF10661); **d**, D<sub>1</sub>R (500 nM dopamine); **e**, D<sub>2</sub>R (500 nM dopamine); **f**, NT<sub>1</sub>R (10  
708 nM neurotensin).  $*P < 0.05$  by two-way ANOVA, main effect of  $G_{\alpha}$  subtype. For panel **b**,  $n = 3-6$ ; for  
709 panel **c**,  $n = 3-4$ ; for panel **d**,  $n = 4$ , for panel **e**,  $n = 3-4$ ; for panel **f**,  $n = 3$  biological replicates per  
710 condition. Graphs show mean  $\pm$  s.e.m.

711

712 **Figure 5:  $G_{\alpha i}$ : $\beta$ -arrestin scaffolds form functional complexes with ERK.** **a**, Arrangement of  
713 luciferase fragments and mKO acceptor fluorophore for complex BRET on G protein (LgBiT),  $\beta$ -  
714 arrestin (SmBiT), or ERK2 (mKO). **b**, Complex BRET association of  $G_{\alpha i}$ ,  $\beta$ -arrestin, and ERK2 in  
715 cells overexpressing untagged V<sub>2</sub>R following treatment with AVP (500nM). Data were normalized  
716 to both vehicle treatment and cytosolic mKO. **c**, Representative immunoblot of phospho and total  
717 ERK1/2 in ' $\Delta$ Gsix' HEK 293 cells pretreated with PTX (200 ng/mL) and/or  $\beta$ arr1/2 siRNA,  
718 stimulated with either vehicle or AVP (500 nM). ERK1/2 phosphorylation was nearly eliminated in  
719 cells treated with both PTX and  $\beta$ arr1/2 siRNA. **d**, Quantification of ERK immunoblots.  $*P < 0.05$ ,  
720  $***P < 0.001$ , two-way ANOVA with Bonferroni post hoc to no treatment, control siRNA group. The  
721 net BRET ratio of cytosolic mKO control was subtracted from the net BRET ratio of ERK-mKO to  
722 yield an adjusted BRET ratio that is the ordinate of panel **b**. Immunoblots are representative of  
723 three separate experiments. For panel **b**,  $n = 5$ ; panel **d**,  $n = 4$ . Immunoblot is representative of four  
724 experiments. PTX, pertussis toxin. Graphs show mean  $\pm$  s.e.m.

725

726 **Figure 6: Cell migration to the  $\beta$ -arrestin-biased Angiotensin ligand TRV120023 requires**  
727 **both  $G_{\alpha i}$  and  $\beta$ -arrestins.** **a**, BRET assay quantifying the recruitment of  $\beta$ -arrestin-2-YFP to AT<sub>1</sub>R-  
728 RlucII following treatment with either angiotensin II or TRV120023. Assessment of canonical G  
729 protein signalling at the Angiotensin II type 1 receptor (AT<sub>1</sub>R) following treatment with either the  
730 endogenous ligand, angiotensin II (**b**) or the previously characterised  $\beta$ -arrestin-biased ligand  
731 TRV120023 (**c**). **d**, Representative images of the four TRV120023 migration conditions in HEK  
732 293 cells stably expressing AT<sub>1</sub>R. **e**, Quantification of PTX pretreatment (200 ng/mL) and/or  $\beta$ -  
733 arr1/2 siRNA on TRV120023-induced migration for the experiment shown in panel **d**. **f**, Split  
734 luciferase assay for monitoring G protein- $\beta$ -arrestin association after treatment of AT<sub>1</sub>R with either  
735 angiotensin II or TRV120023.  $*P < 0.05$ , two-way ANOVA with Bonferroni post hoc to no treatment,  
736 control siRNA group.  $\#P < 0.05$ , two-way ANOVA with Bonferroni post hoc compared to control  
737 siRNA, PTX pretreated group. For panel **a**,  $n = 4$  per condition, for panels **b** and **c**,  $n = 4-5$  per  
738 condition, for panels **e** and **f**,  $n = 4$  per condition. Graphs show mean  $\pm$  s.e.m.

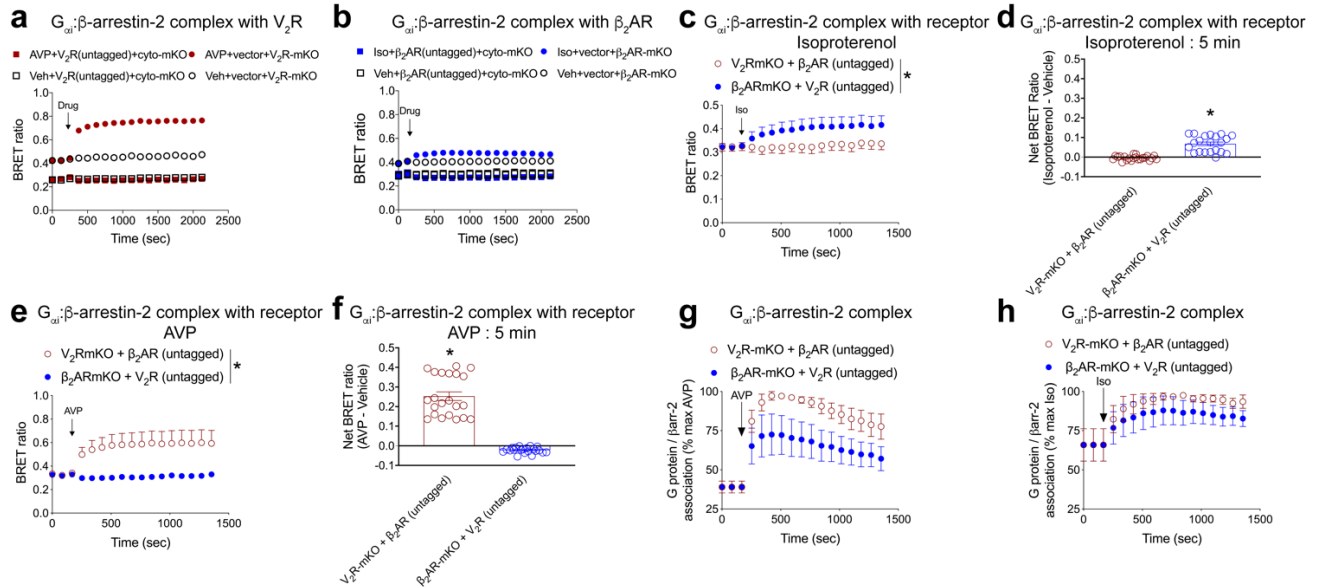

739  
 740  
 741  
 742  
 743  
 744  
 745  
 746  
 747  
 748  
 749  
 750  
 751  
 752  
 753  
 754  
 755  
 756  
 757  
 758  
 759  
 760  
 761  
 762  
 763  
 764  
 765  
 766  
 767  
 768  
 769

**Extended Data Figure 1: Additional complex BRET controls.** HEK 293T cells were transiently transfected with the indicated receptor(s) and assay components. Cytosolic mKO (untagged) was utilized as a non-specific dipole acceptor control. **a**, G protein- $\beta$ -arrestin complex association with mKO. mKO was expressed either in the cytosol (untagged) or tagged to the C-terminus of  $V_2R$ . For the cytosolic mKO groups, untagged  $V_2R$  was transfected to allow for AVP-induced G protein: $\beta$ -arrestin association. To kinetically assess ligand-induced increases in  $V_2R$ :G protein: $\beta$ -arrestin formation, three baseline reads were conducted, followed by treatment with either vehicle or AVP (500 nM). Consistent with a selective interaction, only AVP treatment of the  $V_2R$ -mKO condition resulted in formation of a  $V_2R$ : $G_{\alpha i}$  protein: $\beta$ -arrestin megaplex. Baseline differences in the BRET ratio observed between cytosolic mKO and  $V_2R$ -mKO most likely reflect differences in mKO localization within the cell. **b**, Similar experiment to panel **a**, except assessing a  $\beta_2AR$   $G_{\alpha i}$ : $\beta$ -arrestin megaplex following treatment with either vehicle or isoproterenol (10  $\mu$ M) after three baseline reads. mKO was either expressed in the cytosol or tagged on the C-terminus of  $\beta_2AR$ . Panels **c-h**, experiments were conducted to test the specificity of the complex BRET assay to test if an untagged receptor stimulated with its cognate ligand could form a 'bystander,' non-specific megaplex. In panels **c-h**, replicate experiments were conducted within the same plates under the indicated assay conditions to minimize plate to plate variation. **c**, Only when AVP is paired with  $V_2R$ -mKO is a  $V_2R$ : $G_{\alpha i}$ : $\beta$ -arrestin megaplex formed, and no increase in the BRET ratio is observed under conditions with cells expressing  $\beta_2AR$ -mKO and untagged  $V_2R$ . This indicates complex BRET selectively measures GPCR megaplexes and minimizes bystander effects. **d**, 5 minute time point of data shown in panel **c**. **e**, Similar experiment to panel **c**, except assessing the ability of isoproterenol (10  $\mu$ M) to quantify  $\beta_2AR$ : $G_{\alpha i}$ : $\beta$ -arrestin in cells expressed either native  $\beta_2AR$  with  $V_2R$ -mKO or  $\beta_2AR$ -mKO with untagged  $V_2R$ . Similar to panel **c**, only when isoproterenol is paired with  $\beta_2AR$ -mKO is a  $\beta_2AR$ : $G_{\alpha i}$ : $\beta$ -arrestin megaplex formed, and no increase in the BRET ratio is observed under conditions with cells expressing  $\beta_2AR$ -mKO and untagged  $V_2R$ . **f**, 5 minute time point of data shown in panel **e**. In panels **g** and **h**, only luciferase complementation in the 480nm channel that indicates  $G_{\alpha i}$ : $\beta$ -arrestin complex formation is shown (no BRET data is included). The same cells and conditions utilized in panels **c-f** are used. This control experiment assessed the ability of either native  $V_2R$  or  $V_2R$ -mKO to induce association of G protein- $\beta$ -arrestin. **g**, As expected from data shown in Figures 3 and 4 in the main text, AVP (500 nm) induced association

770 of  $G_{\alpha i}$  and  $\beta$ -arrestin-2 in cells expressing either native  $V_2R$  or  $V_2R$ -mKO. Slight deviations in  
771 efficacy likely reflect minor differences in surface expression. **h**, Similar experiment to panel **g**,  
772 except assessing the ability of isoproterenol (10  $\mu$ M) to induce association of  $G_{\alpha i}$ : $\beta$ -arrestin in cells  
773 expressing either untagged  $\beta_2AR$  or  $\beta_2AR$ -mKO. Similar to panel **g**, slight deviations in efficacy  
774 likely reflect minor differences in receptor surface expression. For panels **c**, **e**,  $*P < 0.05$ , two way  
775 ANOVA with main effect of construct. For panels **d**, **f**,  $*P < 0.05$ , two-tailed t-test. Panels **a**, **b**,  $n=4$   
776 per condition; panels **c-h**,  $n=3$  per condition. Individual wells in the 96 well plates of the 3 different  
777 replicates are shown in panels **d** and **f** for the purpose of displaying experimental variability.  
778 Graphs show mean  $\pm$  s.e.m.

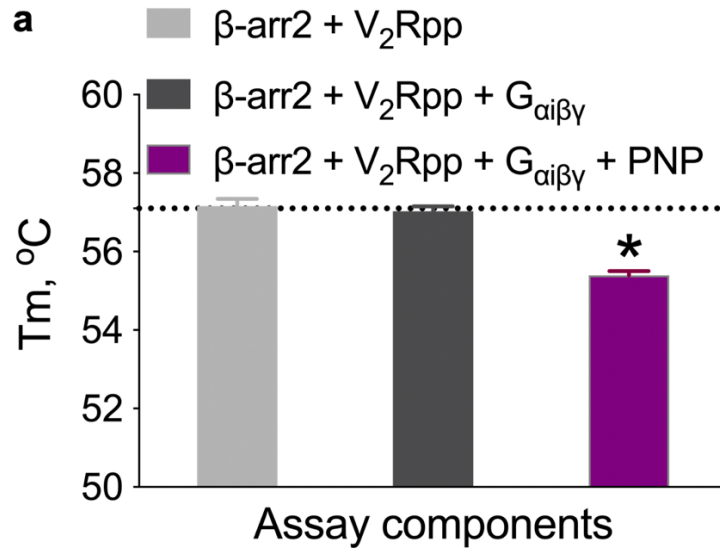

779

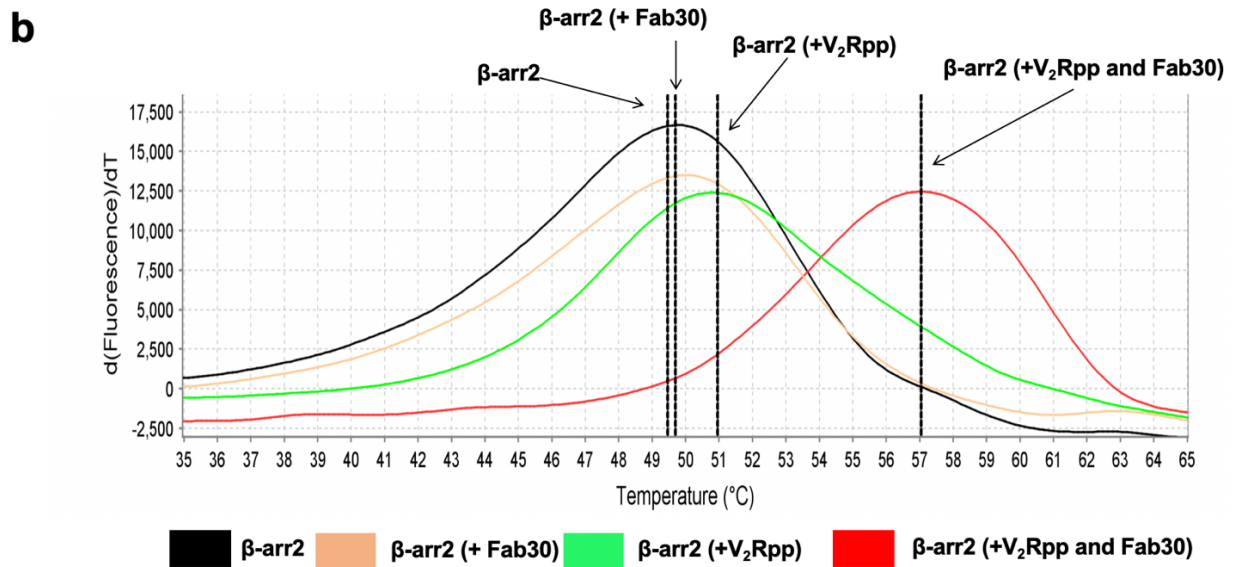

780



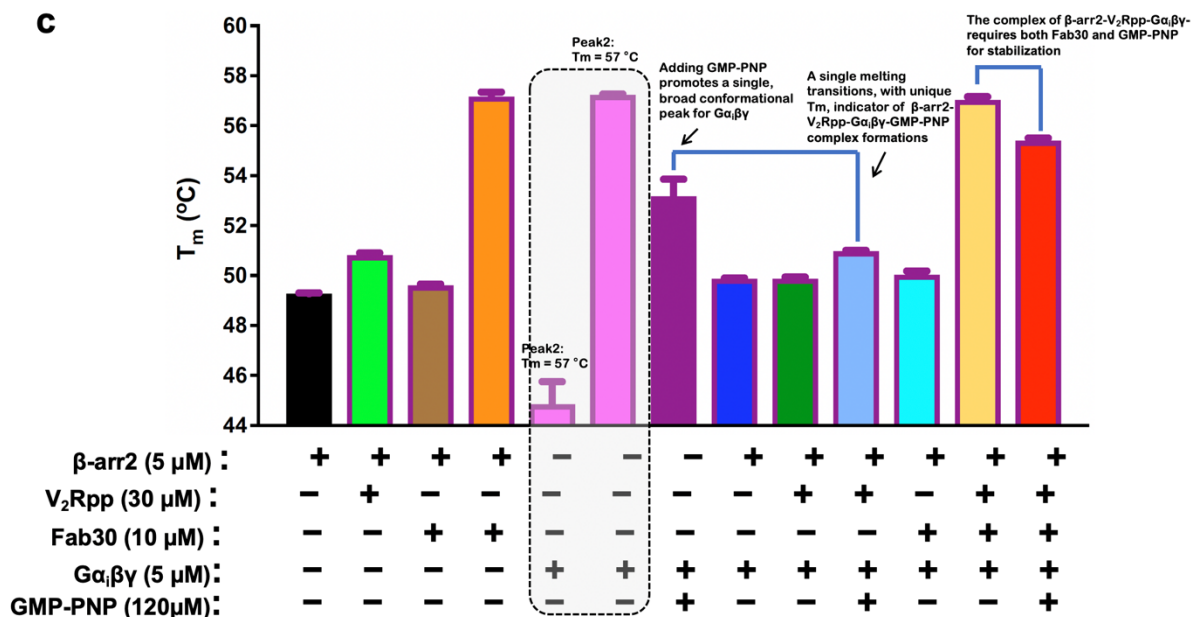

781  
782

### Extended Data Figure 2: Thermal stability assay melting curves

783  
784 **a**, Thermal stability assay of purified complex components including  $\beta$ -arrestin-2, phosphorylated  
785 vasopressin C-terminal peptide (V<sub>2</sub>Rpp), with heterotrimeric G<sub>α</sub>βγ ± non-hydrolyzable GTP (PNP).  
786 All TSA experiments contained the stabilizing antigen binding fragment 30 (Fab30). The change  
787 in melting temperature with the indicated assay components is consistent with complex formation.  
788 **b**, melt profiles of  $\beta$ -arrestin-2 alone (black), in presence of a GPCR V<sub>2</sub>-receptor C-terminal tail  
789 phosphopeptide (V<sub>2</sub>Rpp) (green), Fab30 (orange) or V<sub>2</sub>Rpp plus Fab30 (red) are indicated. Shift  
790 in the melt curve upon addition of V<sub>2</sub>Rpp or V<sub>2</sub>Rpp together with Fab30 (stabilizes an active  
791 conformation of  $\beta$ -arrestins) to  $\beta$ -arrestin-2 alone indicates formation of complexes, confirming  
792 our previous work<sup>11</sup>. **c**, quantitative analysis of various control conditions as well as binding of  
793 active  $\beta$ -arrestin-2 (plus V<sub>2</sub>Rpp and stabilized by Fab30) to G<sub>α</sub>i (bound nonhydrolyzable GTP  
794 analog of GTP, GMP-PNP) as assessed using thermal structural stability assay. Derivative  
795 melting temperatures of the various reaction complexes were computed and plotted as indicated  
796 in the figure on y-axis. Each condition differed with regard to the presence of the components as  
797 indicated in the bar graphs. For all conditions, data were derived from three independent  
798 experiments. \**P* < 0.05, one way ANOVA with Bonferroni post hoc. Graphs show mean ± s.e.m.

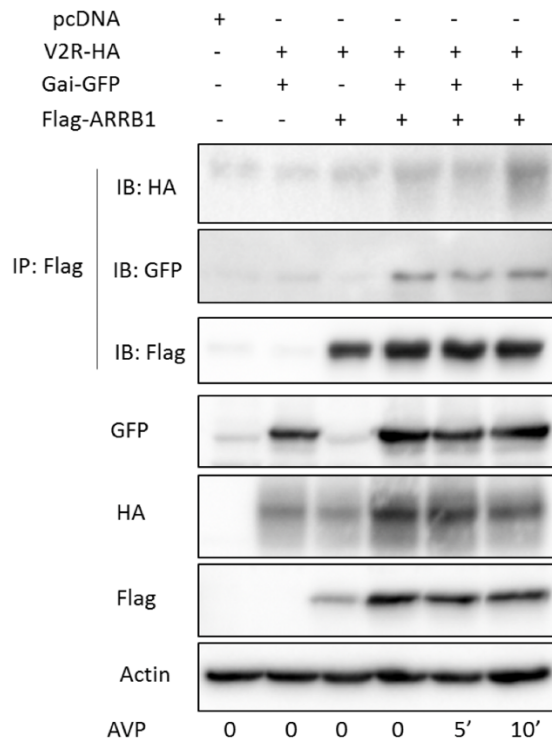

799  
800  
801  
802  
803  
804  
805  
806  
807  
808

### Extended Data Figure 3: Immunoprecipitation of $G_{\alpha i}$ : $\beta$ -arrestin:V<sub>2</sub>R megaplex

HEK293 cells were transfected with the indicated plasmids and treated with AVP (500 nM) for the indicated duration. Co-transfection of  $G_{\alpha i}$  and  $\beta$ -arrestin increased the expression of both proteins. Ligand treatment did not appreciably increase associated of  $G_{\alpha i}$  and  $\beta$ -arrestin, which is explained by a high constitutive association required by the assay conditions and decreased granularity of signal relative to complex BRET (see extended Figure 6, where higher expression of assay components reduced agonist-induced signal). Data is representative of three separate experiments.

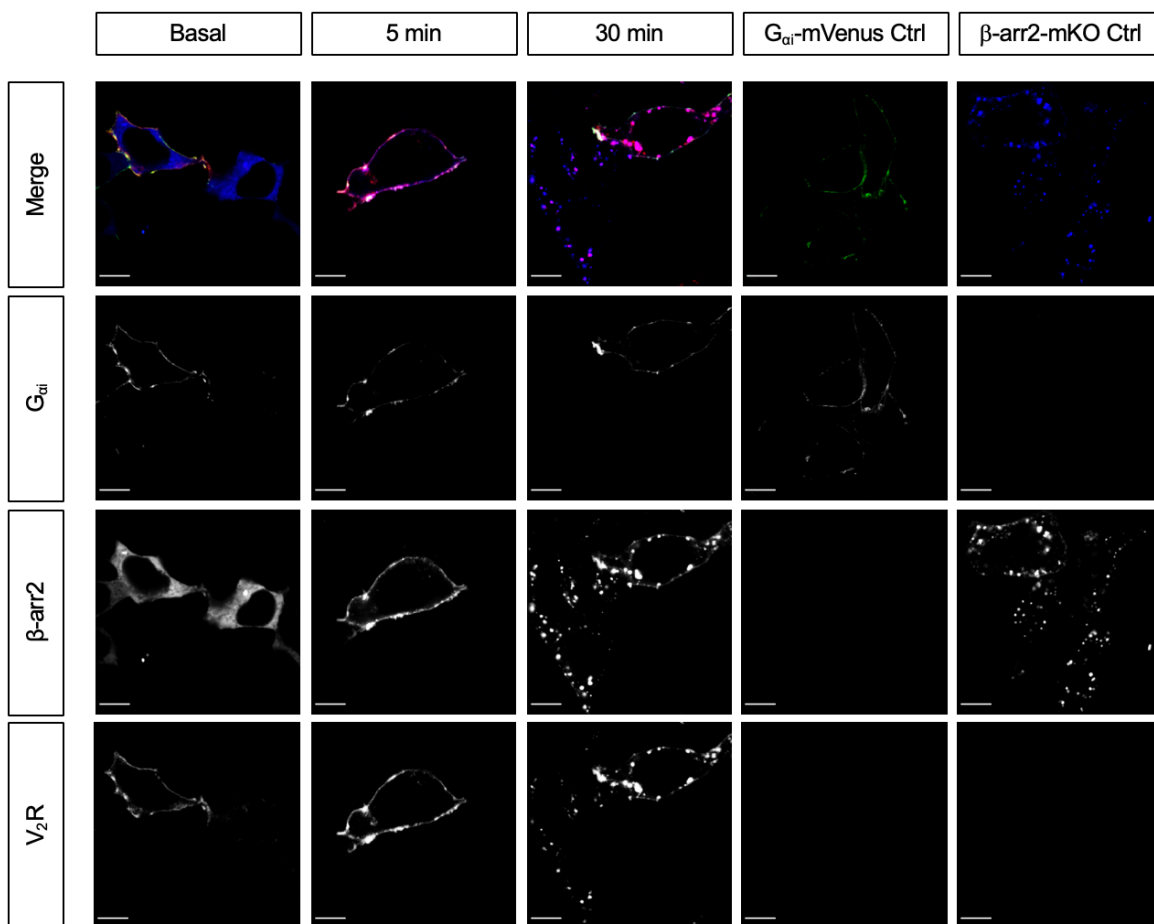

809  
810  
811  
812  
813  
814  
815  
816  
817

**Extended Data Figure 4: Single component controls to validate imaging parameters in Figure 2 of the main text.** HEK293T cells transiently transfected with either all 3 components (G<sub>oi</sub>-mVenus, β-arrestin-2-mKO, Mars1-V<sub>2</sub>R) or single-colour controls and were then stimulated and fixed at various time points. Following this, the samples were imaged on a confocal microscope using identical parameters. All image adjustments were identical and consistent across all samples. Single-colour control samples (G<sub>oi</sub>-mVenus or β-arrestin-2-mKO alone) were used to verify that each imaging channel was only reporting on one component of the megaplex. Scale bars = 10 μm.

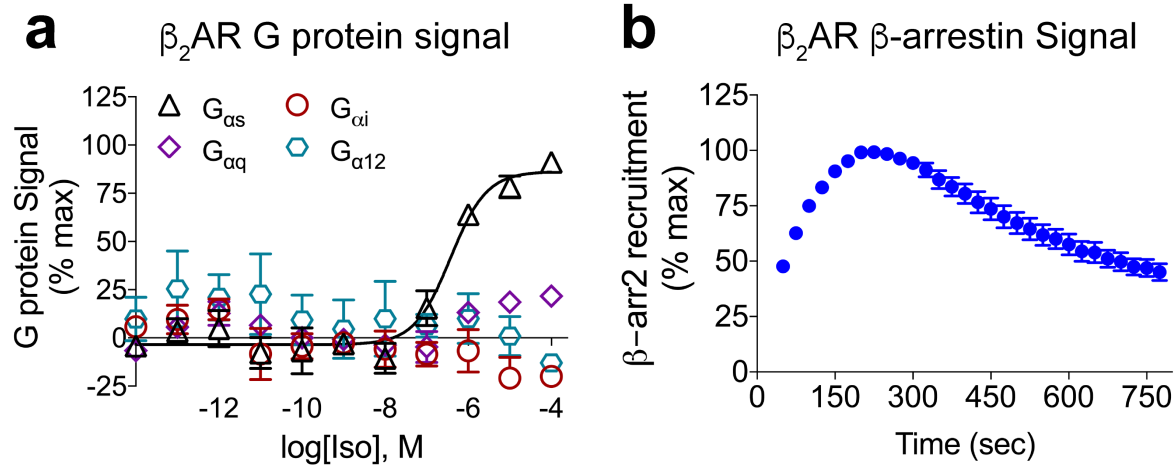

818

819

820

821

822

823

824

**Extended Data Figure 5: Assessment of  $\beta_2$ AR-mediated G protein and  $\beta$ -arrestin signalling.**

**a**, Assessment of G protein signalling following agonist treatment of the  $\beta_2$ AR in 'ΔGsix' HEK 293 cells transfected with the indicated  $G_{\alpha}$  subunits and treated at the indicated concentration of isoproterenol. **b**, Assessment of  $\beta$ -arrestin-2 recruitment using luciferase complementation with  $\beta_2$ AR-LgBiT and smBiT- $\beta$ -arrestin-2 in WT HEK293T cells following treatment with isoproterenol (10  $\mu$ M). n=3 per condition. Graphs show mean  $\pm$  s.e.m.

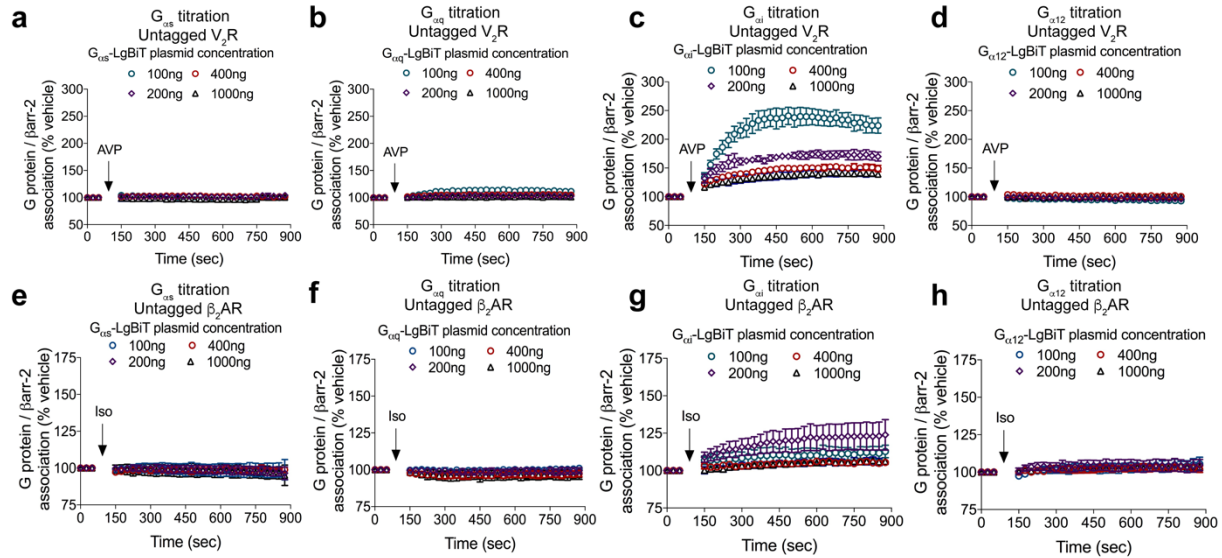

825  
826  
827  
828  
829  
830  
831  
832  
833  
834  
835  
836  
837  
838

**Extended Data Figure 6: Increased overexpression of  $G_{\alpha}$  decreases window for monitoring agonist-induced  $G_{\alpha_s}$ ,  $G_{\alpha_{12}}$ , or  $G_{\alpha_q}$  association with  $\beta$ -arrestin-2.** Split luciferase assay titration-response (cartoon shown in Fig. 3a) in HEK 293T cells quantifying agonist-stimulated  $G_{\alpha}$ -family proteins association with  $\beta$ -arrestin. HEK 293T cells transiently transfected with  $V_2R$  and either 100 ng, 200ng, 400ng, or 1000ng of **a**,  $G_{\alpha_s}$ -LgBiT, **b**,  $G_{\alpha_q}$ -LgBiT, **c**,  $G_{\alpha_i}$ -LgBiT, **d**,  $G_{\alpha_{12}}$ -LgBiT expression vector and a constant 500 ng of SmBiT- $\beta$ -arrestin-2 expression vector. Cells were treated with either vehicle or AVP (500 nM). Percentage signal above vehicle treatment is shown. Similarly, FLAG- $\beta_2AR$  and either 100, 200, 400, or 1000 ng of  $G_{\alpha_s}$ -LgBiT **e**,  $G_{\alpha_q}$ -LgBiT **f**,  $G_{\alpha_i}$ -LgBiT **g**,  $G_{\alpha_{12}}$ -LgBiT **h**, expression vector and 500 ng of SmBiT- $\beta$ -arrestin-2 expression vector. Cells were treated with either vehicle or isoproterenol (10  $\mu$ M). For panels **a,b**,  $n=2-3$  per condition, for panel **c**,  $n=3-4$  per condition, for panel **d**,  $n=3$  per condition, for panel **e**,  $n=3-4$  per condition, for panel **f**,  $n=2-3$  per condition, for panel **g**,  $n=3-6$  per condition, for panel **h**,  $n=3$  per condition.

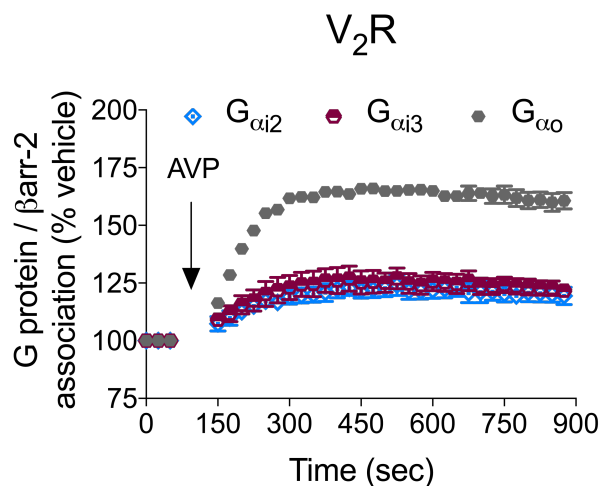

839

840 **Extended Data Figure 7: Other inhibitory  $G_{\alpha}$  family members form a complex with  $\beta$ -arrestin**  
841 **following agonist treatment.** HEK 293T cells were transfected with untagged  $V_2R$  along with  
842 the indicated LgBiT-tagged  $G_{\alpha i}$ -family proteins ( $G_{\alpha i2}$ ,  $G_{\alpha i3}$ ,  $G_{\alpha o}$ ), smBiT- $\beta$ -arrestin-2, and treated  
843 with AVP (500 nM) or vehicle to quantify association with smBiT- $\beta$ -arrestin-2.  $n=3$  per condition.  
844 Graph shows mean  $\pm$  s.e.m.

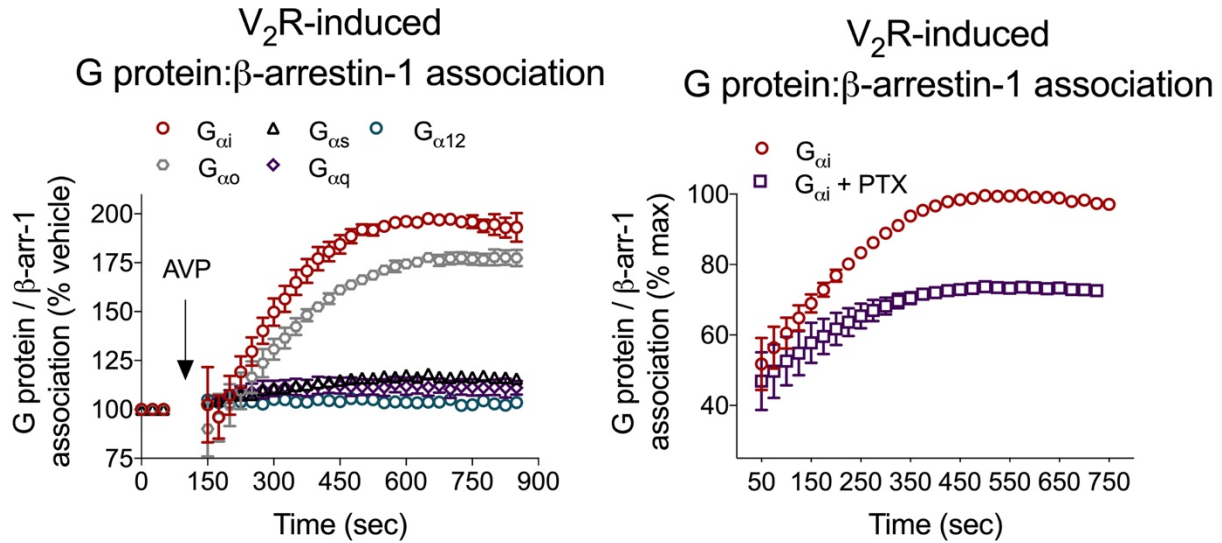

845  
846  
847  
848  
849  
850  
851  
852  
853

**Extended Data Figure 8: β-arrestin-1 shows a similar pattern to β-arrestin-2 of agonist-induced association with G<sub>αi</sub>-family that is *pertussis toxin* sensitive.** a, HEK 293T cells were transiently transfected with V<sub>2</sub>R, smBiT-β-arrestin-1, and either LgBiT-tagged G<sub>αi</sub>, G<sub>αo</sub>, G<sub>αq</sub>, G<sub>αs</sub>, or G<sub>α12</sub> and stimulated with AVP (500 nM). b, AVP-induced association of SmBiT-β-arrestin-1 and G<sub>αi</sub>-LgBiT was attenuated by *pertussis toxin* pretreatment (200 ng/mL). Luminescence values are normalized within well to signal prior to agonist treatment. n=3 replicates per condition. Graphs show mean ± s.e.m.

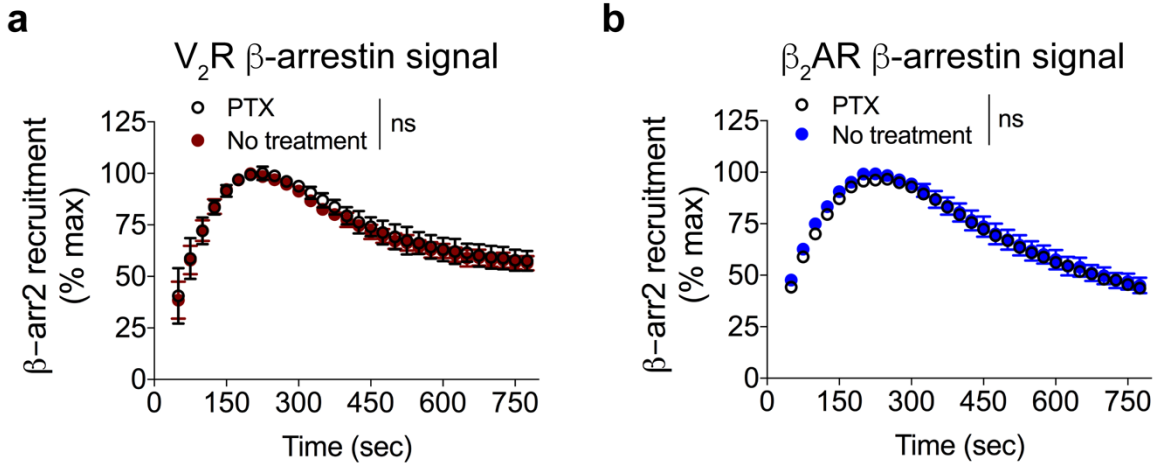

854  
855  
856  
857  
858  
859  
860  
861  
862

**Extended Data Figure 9: *Pertussis toxin* pretreatment does not affect agonist-induced  $\beta$ -arrestin-2 recruitment to either the  $V_2R$  or the  $\beta_2AR$ .** HEK 293T cells were transiently transfected with smBiT- $\beta$ -arrestin-2 and either  $V_2R$ -LgBiT or  $\beta_2AR$ -LgBiT. Cells were incubated with or without *pertussis toxin* (200 ng/mL). **a**, No effect of *pertussis toxin* pretreatment on AVP (500 nM)-induced  $\beta$ -arrestin-2 recruitment to  $V_2R$  relative to non-treated controls. **b**, No effect of *pertussis toxin* pretreatment on isoproterenol (10  $\mu$ M)-induced  $\beta$ -arrestin-2 recruitment to the  $\beta_2AR$  relative to non-treated controls.  $n=3$  per condition. Graphs show mean  $\pm$  s.e.m.



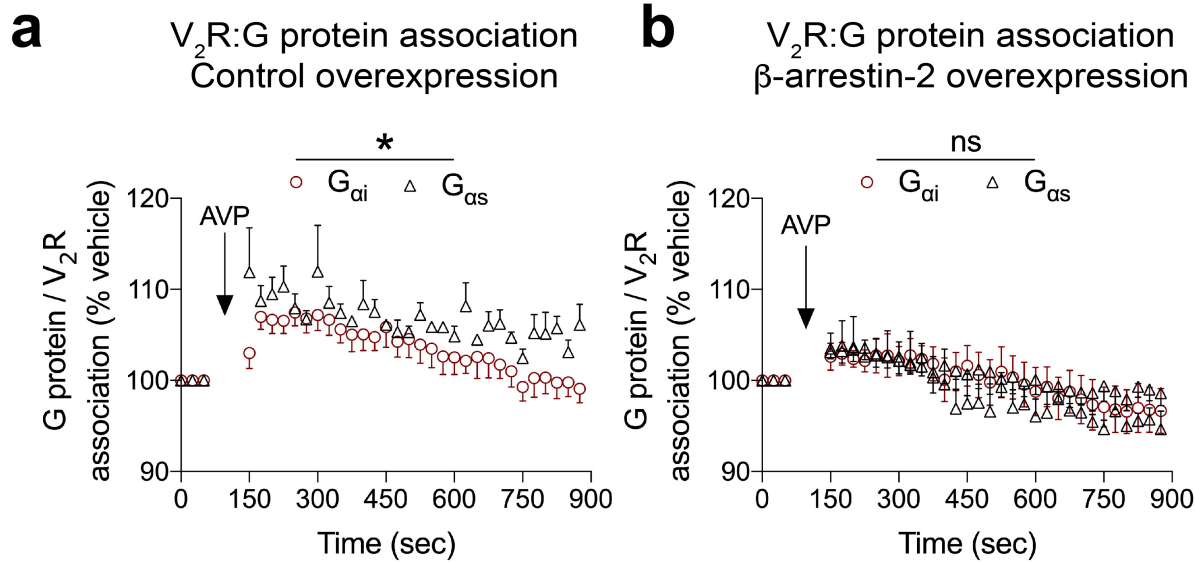

863  
864  
865  
866  
867  
868  
869  
870

**Extended Data Figure 10: G<sub>ai</sub> and G<sub>as</sub> are recruited to the V<sub>2</sub>R following agonist treatment.** HEK 293T cells were transiently transfected with V<sub>2</sub>R-smBiT, either G<sub>ai</sub>-LgBiT or G<sub>as</sub>-LgBiT, and either **a**, pcDNA or **b**, untagged  $\beta$ -arrestin-2. Cells were treated with AVP (500 nM), and association of V<sub>2</sub>R and the indicated G $\alpha$  was measured by luminescence. Both G<sub>as</sub> and G<sub>ai</sub> were recruited to V<sub>2</sub>R following AVP treatment, with the efficacy of the interaction significantly greater in the pcDNA control group, but not in the  $\beta$ -arrestin-2 overexpression group. \* $P < 0.05$ , For panel **a**,  $n = 3-5$  per condition; for panel **b**,  $n = 3-4$  per condition. Graphs show mean  $\pm$  s.e.m.

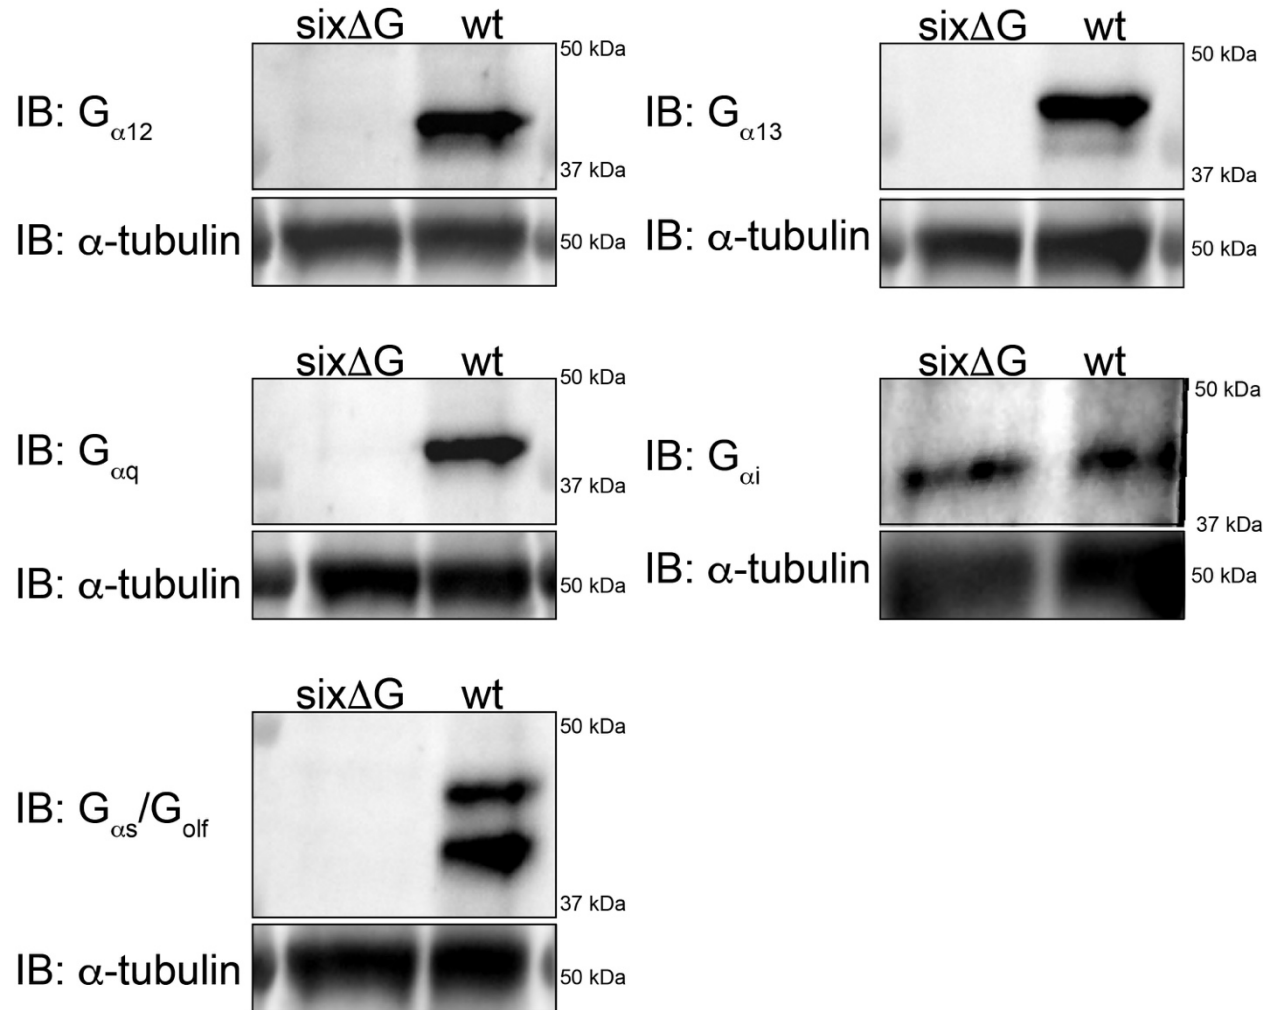

871  
872 **Extended Data Figure 11: Validation of G $_{\alpha}$  protein knockout with CRISPR/Cas9.** Immunoblot  
873 of lysates collected from previously described ' $\Delta$ Gsix' HEK 293 cells shows only measurable G $_{\alpha i}$ ,  
874 but not other G $_{\alpha}$  protein family members. Lysates from parental WT HEK 293 cells are shown as  
875 a control.
